# Supplementary material for: Spectral properties of 441 radio pulsars
Source: Oxford University Press journal article supplement (doi:10.1093/mnras/stx2476), 2017-09-26
Supplement: stx2476_supp.zip [file stx2476_supp.zip]

**Table 1.** Band-integrated flux densities at 728, 1382 and 3100 MHz, the spectral classification, the frequency range  $\Delta\nu$  the classification was performed over and an eventual spectral index was determined for, the spectral index  $\alpha$  for the pulsars that have simple power law spectra and the robust modulation index  $m_r$  at all three centre frequencies for pulsars of which we have at least six measurement epochs. The flux density uncertainties include scintillation and a systematic contribution, in addition to the statistical uncertainty. Upper limits are reported at the  $3\sigma$  level and all other uncertainties at the  $1\sigma$  level.

| PSRJ        | $S_{728}$<br>[mJy] | $S_{1382}$<br>[mJy] | $S_{3100}$<br>[mJy] | class         | $\Delta\nu$<br>[GHz] | $\alpha$         | $m_r$ , 728            | $m_r$ , 1382              | $m_r$ , 3100           |
|-------------|--------------------|---------------------|---------------------|---------------|----------------------|------------------|------------------------|---------------------------|------------------------|
| J0401–7608  | $4 \pm 2$          | –                   | $0.8 \pm 0.5$       | pl            | $0.4 - 3.4$          | $-1.5 \pm 0.5$   | –                      | –                         | –                      |
| J0437–4715  | $300 \pm 200$      | $160 \pm 20$        | $30 \pm 30$         | broken pl     | $0.08 - 17.0$        | –                | –                      | –                         | –                      |
| J0511–6508  | $1.3 \pm 0.7$      | $0.6 \pm 0.2$       | $< 0.1$             | –             | $0.7 - 1.4$          | –                | –                      | –                         | –                      |
| J0519–6932  | –                  | $0.14 \pm 0.04$     | –                   | –             | $1.4 - 1.4$          | –                | –                      | –                         | –                      |
| J0536–7543  | $11 \pm 7$         | –                   | $3 \pm 2$           | pl            | $0.4 - 3.5$          | $-1.8 \pm 0.4$   | –                      | –                         | –                      |
| J0543+2329  | $25 \pm 2$         | $10.7 \pm 0.7$      | $3.0 \pm 0.2$       | broken pl     | $0.1 - 32.0$         | –                | $0.18^{+0.2}_{-0.08}$  | $0.41^{+0.09}_{-0.04}$    | $0.23^{+0.3}_{-0.07}$  |
| J0601–0527  | $6 \pm 2$          | –                   | $0.6 \pm 0.2$       | pl            | $0.1 - 4.9$          | $-1.74 \pm 0.08$ | –                      | –                         | –                      |
| J0614+2229  | $8.8 \pm 0.8$      | $3.3 \pm 0.2$       | $0.76 \pm 0.06$     | pl            | $0.09 - 3.5$         | $-1.77 \pm 0.05$ | $0.25^{+0.07}_{-0.2}$  | $0.18^{+0.01}_{-0.03}$    | $0.22^{+0.1}_{-0.08}$  |
| J0624–0424  | $3.0 \pm 1.0$      | –                   | $< 0.05$            | pl            | $0.1 - 1.4$          | $-1.0 \pm 0.5$   | –                      | –                         | –                      |
| J0627+0706  | $3.8 \pm 0.2$      | $1.39 \pm 0.08$     | $0.31 \pm 0.05$     | pl            | $0.4 - 3.1$          | $-1.6 \pm 0.2$   | $0.11^{+0.03}_{-0.05}$ | $0.27^{+0.02}_{-0.06}$    | $0.39^{+0.04}_{-0.1}$  |
| J0630–2834  | $180 \pm 90$       | –                   | $1.6 \pm 0.8$       | low turn-over | $0.04 - 10.6$        | –                | –                      | –                         | –                      |
| J0656–2228  | $0.9 \pm 0.4$      | $3.0 \pm 1.0$       | $0.3 \pm 0.2$       | pl            | $0.7 - 3.1$          | $-1.0 \pm 1.0$   | –                      | –                         | –                      |
| J0659+1414  | $3.9 \pm 0.8$      | $2.7 \pm 0.2$       | $1.6 \pm 0.3$       | lps           | $0.09 - 8.4$         | –                | $0.6^{+0.4}_{-0.4}$    | $0.55^{+0.09}_{-0.07}$    | $0.6^{+0.2}_{-0.2}$    |
| J0711–6830  | $7 \pm 4$          | $5 \pm 3$           | $1.0 \pm 0.7$       | lps           | $0.4 - 3.4$          | –                | –                      | –                         | –                      |
| J0721–2038  | $0.5 \pm 0.2$      | $0.21 \pm 0.07$     | –                   | –             | $0.7 - 1.4$          | –                | –                      | –                         | –                      |
| J0729–1448  | $2.1 \pm 0.2$      | $0.83 \pm 0.06$     | $0.19 \pm 0.02$     | pl            | $0.7 - 3.1$          | $-1.7 \pm 0.3$   | $0.25^{+0.2}_{-0.09}$  | $0.53^{+0.06}_{-0.07}$    | $0.3^{+0.4}_{-0.2}$    |
| J0729–1836  | $4.0 \pm 1.0$      | $1.9 \pm 0.5$       | $0.5 \pm 0.2$       | pl            | $0.4 - 3.1$          | $-1.7 \pm 0.2$   | –                      | –                         | –                      |
| J0737–3039B | –                  | $< 0.1$             | –                   | –             | $1.4 - 1.4$          | –                | –                      | –                         | –                      |
| J0742–2822  | $90 \pm 30$        | $26 \pm 2$          | $6.8 \pm 0.5$       | broken pl     | $0.1 - 10.6$         | –                | –                      | $0.28^{+0.05}_{-0.06}$    | $0.22^{+0.1}_{-0.07}$  |
| J0745–5353  | $12.0 \pm 0.7$     | $5.0 \pm 0.2$       | $1.21 \pm 0.07$     | pl            | $0.4 - 3.5$          | $-1.6 \pm 0.06$  | $0.07^{+0.04}_{-0.03}$ | $0.055^{+0.006}_{-0.007}$ | $0.14^{+0.04}_{-0.04}$ |
| J0751+1807  | –                  | –                   | $< 0.06$            | pl            | $0.1 - 3.0$          | $-1.6 \pm 0.3$   | –                      | –                         | –                      |
| J0758–1528  | $4.0 \pm 1.0$      | $2.6 \pm 0.8$       | $1.4 \pm 0.5$       | pl            | $0.1 - 4.9$          | $-1.1 \pm 0.2$   | –                      | –                         | –                      |
| J0809–4753  | $21 \pm 9$         | $2.6 \pm 0.6$       | $0.46 \pm 0.07$     | low turn-over | $0.08 - 3.4$         | –                | –                      | –                         | –                      |
| J0812–3905  | $1.6 \pm 0.2$      | $0.38 \pm 0.09$     | $< 0.1$             | –             | $0.7 - 1.4$          | –                | –                      | –                         | –                      |
| J0818–3049  | $1.3 \pm 0.3$      | $0.33 \pm 0.09$     | $< 5.0$             | –             | $0.7 - 1.4$          | –                | –                      | –                         | –                      |
| J0818–3232  | $2.4 \pm 0.4$      | $1.4 \pm 0.4$       | $0.18 \pm 0.04$     | pl            | $0.7 - 3.3$          | $-1.7 \pm 0.2$   | –                      | –                         | –                      |
| J0820–1350  | $27 \pm 8$         | $6 \pm 2$           | $1.4 \pm 0.7$       | broken pl     | $0.06 - 4.9$         | –                | –                      | –                         | –                      |
| J0820–3826  | $1.27 \pm 0.08$    | $0.49 \pm 0.03$     | $0.093 \pm 0.007$   | pl            | $0.7 - 3.1$          | $-1.8 \pm 0.2$   | $0.14^{+0.08}_{-0.06}$ | $0.24^{+0.05}_{-0.02}$    | –                      |
| J0820–4114  | $20 \pm 10$        | $5.0 \pm 1.0$       | $1.0 \pm 0.4$       | lps           | $0.08 - 3.4$         | –                | –                      | –                         | –                      |
| J0823+0159  | $4 \pm 3$          | $4 \pm 2$           | $0.4 \pm 0.3$       | lps           | $0.1 - 4.9$          | –                | –                      | –                         | –                      |
| J0834–4159  | $0.82 \pm 0.08$    | $0.28 \pm 0.02$     | $0.08 \pm 0.01$     | pl            | $0.7 - 3.1$          | $-1.6 \pm 0.3$   | $0.2^{+0.2}_{-0.2}$    | $0.28^{+0.04}_{-0.04}$    | –                      |
| J0835–4510  | $3100 \pm 200$     | $1050 \pm 60$       | $170 \pm 20$        | broken pl     | $0.08 - 24.0$        | –                | $0.13^{+0.03}_{-0.08}$ | $0.19^{+0.03}_{-0.03}$    | $0.32^{+0.04}_{-0.09}$ |
| J0837+0610  | $13 \pm 6$         | $5.0 \pm 1.0$       | $0.2 \pm 0.1$       | low turn-over | $0.02 - 4.9$         | –                | –                      | –                         | –                      |
| J0837–4135  | $110 \pm 30$       | $35 \pm 9$          | $8 \pm 2$           | broken pl     | $0.1 - 8.4$          | –                | –                      | –                         | –                      |
| J0840–5332  | $23 \pm 9$         | $1.7 \pm 0.5$       | $0.26 \pm 0.07$     | broken pl     | $0.1 - 3.1$          | –                | –                      | –                         | –                      |
| J0846–3533  | $12 \pm 2$         | $5.0 \pm 1.0$       | $0.7 \pm 0.1$       | pl            | $0.4 - 3.4$          | $-2.0 \pm 0.2$   | –                      | –                         | –                      |
| J0855–3331  | $3.5 \pm 0.7$      | –                   | $0.11 \pm 0.02$     | pl            | $0.1 - 3.1$          | $-2.0 \pm 0.1$   | –                      | –                         | –                      |
| J0855–4644  | $0.57 \pm 0.05$    | $0.28 \pm 0.02$     | $0.105 \pm 0.006$   | pl            | $0.7 - 3.1$          | $-1.2 \pm 0.2$   | –                      | $0.18^{+0.03}_{-0.02}$    | –                      |
| J0856–6137  | $3.1 \pm 0.6$      | $3.3 \pm 0.7$       | $0.11 \pm 0.02$     | broken pl     | $0.08 - 3.1$         | –                | –                      | –                         | –                      |
| J0857–4424  | $3.3 \pm 0.2$      | $0.98 \pm 0.05$     | $0.23 \pm 0.02$     | pl            | $0.4 - 3.1$          | $-1.9 \pm 0.1$   | $0.09^{+0.02}_{-0.05}$ | $0.15^{+0.02}_{-0.02}$    | $0.24^{+0.1}_{-0.07}$  |
| J0900–3144  | $6.0 \pm 1.0$      | $3.0 \pm 1.0$       | $0.9 \pm 0.2$       | pl            | $0.7 - 3.4$          | $-1.3 \pm 0.3$   | –                      | –                         | –                      |
| J0901–4624  | $0.7 \pm 0.1$      | $0.51 \pm 0.03$     | $0.18 \pm 0.02$     | pl            | $0.7 - 3.1$          | $-1.1 \pm 0.3$   | $0.5^{+0.1}_{-0.2}$    | $0.43^{+0.07}_{-0.05}$    | $0.36^{+0.09}_{-0.1}$  |
| J0904–7459  | $8 \pm 2$          | $2.0 \pm 0.7$       | $0.3 \pm 0.1$       | pl            | $0.4 - 3.1$          | $-1.9 \pm 0.5$   | –                      | –                         | –                      |
| J0905–5127  | $3.4 \pm 0.5$      | $1.05 \pm 0.06$     | $0.22 \pm 0.03$     | pl            | $0.09 - 3.1$         | $-2.09 \pm 0.07$ | $0.48^{+0.09}_{-0.2}$  | $0.27^{+0.05}_{-0.03}$    | $0.4^{+0.2}_{-0.2}$    |
| J0907–5157  | $30 \pm 6$         | $17 \pm 5$          | $5.8 \pm 0.9$       | lps           | $0.08 - 3.5$         | –                | –                      | –                         | –                      |
| J0908–1739  | $10 \pm 4$         | $4 \pm 2$           | $0.7 \pm 0.4$       | pl            | $0.05 - 3.3$         | $-1.5 \pm 0.2$   | –                      | –                         | –                      |
| J0908–4913  | $33 \pm 5$         | $20.0 \pm 1.0$      | $7.8 \pm 0.6$       | lps           | $0.4 - 17.0$         | –                | $0.5^{+0.1}_{-0.2}$    | $0.25^{+0.06}_{-0.01}$    | $0.2^{+0.1}_{-0.03}$   |
| J0909–7212  | $3.0 \pm 1.0$      | $1.9 \pm 0.5$       | $< 0.3$             | pl            | $0.4 - 1.5$          | $-1.0 \pm 0.6$   | –                      | –                         | –                      |
| J0922+0638  | $17 \pm 9$         | $10 \pm 3$          | $1.3 \pm 0.6$       | low turn-over | $0.02 - 10.6$        | –                | –                      | –                         | –                      |
| J0922–4949  | $1.5 \pm 0.2$      | –                   | $0.32 \pm 0.04$     | pl            | $0.7 - 3.4$          | $-1.0 \pm 0.2$   | –                      | –                         | –                      |
| J0924–5302  | $9 \pm 9$          | $1.1 \pm 0.3$       | $0.2 \pm 0.1$       | pl            | $0.10 - 3.1$         | $-2.16 \pm 0.09$ | –                      | –                         | –                      |
| J0924–5814  | $11 \pm 3$         | $6 \pm 2$           | $1.5 \pm 0.5$       | pl            | $0.4 - 3.4$          | $-1.4 \pm 0.3$   | –                      | –                         | –                      |
| J0934–5249  | $22 \pm 9$         | $3.2 \pm 0.9$       | $0.2 \pm 0.04$      | lps           | $0.3 - 3.1$          | –                | –                      | –                         | –                      |
| J0940–5428  | $1.5 \pm 0.2$      | $0.66 \pm 0.04$     | $0.3 \pm 0.02$      | pl            | $0.7 - 3.1$          | $-1.0 \pm 0.2$   | $0.41^{+0.09}_{-0.2}$  | $0.3^{+0.05}_{-0.05}$     | $0.1^{+0.05}_{-0.05}$  |
| J0942–5552  | $26 \pm 7$         | $11 \pm 3$          | $2.0 \pm 0.3$       | broken pl     | $0.2 - 3.5$          | –                | –                      | –                         | –                      |
| J0942–5657  | $2.6 \pm 0.4$      | $1.0 \pm 0.3$       | $0.3 \pm 0.09$      | low turn-over | $0.08 - 3.3$         | –                | –                      | –                         | –                      |
| J0943+1631  | $5 \pm 3$          | $1.3 \pm 0.6$       | $0.3 \pm 0.2$       | pl            | $0.03 - 3.1$         | $-1.0 \pm 0.4$   | –                      | –                         | –                      |
| J0952–3839  | $1.3 \pm 0.3$      | $4.0 \pm 1.0$       | $< 0.01$            | pl            | $0.4 - 1.5$          | $-2.5 \pm 0.6$   | –                      | –                         | –                      |

Table 1 – *continued*

| PSRJ       | $S_{728}$<br>[mJy] | $S_{1382}$<br>[mJy] | $S_{3100}$<br>[mJy] | class         | $\Delta\nu$<br>[GHz] | $\alpha$         | $m_r, 728$             | $m_r, 1382$            | $m_r, 3100$              |
|------------|--------------------|---------------------|---------------------|---------------|----------------------|------------------|------------------------|------------------------|--------------------------|
| J0953+0755 | $600 \pm 600$      | $100 \pm 40$        | $20 \pm 20$         | low turn-over | $0.02 - 10.6$        | –                | –                      | –                      | –                        |
| J0954–5430 | $0.7 \pm 0.1$      | $0.51 \pm 0.03$     | $0.38 \pm 0.04$     | pl            | $0.7 - 3.4$          | $-0.3 \pm 0.2$   | –                      | $0.43^{+0.04}_{-0.07}$ | $0.29^{+0.2}_{-0.08}$    |
| J0959–4809 | $13 \pm 3$         | $4.0 \pm 0.8$       | $0.5 \pm 0.2$       | lps           | $0.2 - 3.3$          | –                | –                      | –                      | –                        |
| J1001–5507 | $41 \pm 5$         | $10 \pm 3$          | $2.7 \pm 0.4$       | broken pl     | $0.1 - 3.5$          | –                | –                      | –                      | –                        |
| J1001–5559 | $3.4 \pm 0.8$      | $1.4 \pm 0.4$       | $0.11 \pm 0.03$     | pl            | $0.7 - 3.1$          | $-2.4 \pm 0.4$   | –                      | –                      | –                        |
| J1003–4747 | $4.8 \pm 0.9$      | $1.43 \pm 0.08$     | $0.3 \pm 0.04$      | pl            | $0.3 - 3.1$          | $-1.4 \pm 0.1$   | $0.5^{+0.2}_{-0.3}$    | $0.32^{+0.07}_{-0.03}$ | $0.29^{+0.2}_{-0.07}$    |
| J1012–5857 | $13 \pm 5$         | $1.8 \pm 0.3$       | $0.41 \pm 0.04$     | pl            | $0.4 - 3.3$          | $-1.8 \pm 0.1$   | –                      | –                      | –                        |
| J1013–5934 | $3.4 \pm 0.4$      | $2.6 \pm 0.6$       | $0.9 \pm 0.2$       | pl            | $0.7 - 3.5$          | $-0.9 \pm 0.1$   | –                      | –                      | –                        |
| J1015–5719 | $2.7 \pm 0.4$      | $3.0 \pm 0.2$       | $1.7 \pm 0.1$       | pl            | $0.7 - 3.5$          | $-0.62 \pm 0.09$ | –                      | $0.16^{+0.02}_{-0.02}$ | $0.18^{+0.04}_{-0.06}$   |
| J1016–5345 | $2.2 \pm 0.6$      | $1.1 \pm 0.4$       | $0.14 \pm 0.04$     | pl            | $0.4 - 3.1$          | $-1.6 \pm 0.4$   | –                      | –                      | –                        |
| J1016–5819 | $1.18 \pm 0.06$    | $0.36 \pm 0.02$     | $0.053 \pm 0.008$   | pl            | $0.7 - 3.1$          | $-2.0 \pm 0.2$   | $0.06^{+0.2}_{-0.01}$  | $0.29^{+0.02}_{-0.05}$ | –                        |
| J1016–5857 | $1.8 \pm 0.2$      | $0.9 \pm 0.05$      | $0.29 \pm 0.02$     | pl            | $0.7 - 3.1$          | $-1.3 \pm 0.2$   | –                      | $0.26^{+0.02}_{-0.04}$ | $0.2^{+0.1}_{-0.07}$     |
| J1017–5621 | $6.4 \pm 0.7$      | $1.8 \pm 0.4$       | $0.37 \pm 0.04$     | pl            | $0.4 - 3.3$          | $-2.0 \pm 0.1$   | –                      | –                      | –                        |
| J1017–7156 | $3.1 \pm 0.7$      | $1.1 \pm 0.2$       | $0.14 \pm 0.05$     | pl            | $0.7 - 3.1$          | $-1.73 \pm 0.09$ | –                      | –                      | –                        |
| J1018–1642 | $1.3 \pm 0.5$      | $0.7 \pm 0.2$       | $< 0.3$             | pl            | $0.1 - 1.4$          | $-2.0 \pm 0.4$   | –                      | –                      | –                        |
| J1019–5749 | $< 0.6$            | $3.8 \pm 0.2$       | $2.4 \pm 0.1$       | lps           | $1.3 - 3.5$          | –                | –                      | $0.41^{+0.03}_{-0.03}$ | $0.053^{+0.007}_{-0.01}$ |
| J1020–5921 | –                  | $< 5.0$             | –                   | –             | $1.4 - 1.4$          | –                | –                      | –                      | –                        |
| J1020–6026 | $< 0.06$           | $0.25 \pm 0.01$     | $0.16 \pm 0.01$     | –             | $1.4 - 3.1$          | –                | –                      | $0.24^{+0.04}_{-0.05}$ | $0.16^{+0.07}_{-0.05}$   |
| J1024–0719 | –                  | $0.3 \pm 0.2$       | –                   | lps           | $0.1 - 5.0$          | –                | –                      | –                      | –                        |
| J1028–5819 | $< 0.2$            | $0.24 \pm 0.02$     | $0.13 \pm 0.06$     | pl            | $1.4 - 3.1$          | $1.3 \pm 0.8$    | –                      | $0.5^{+0.1}_{-0.1}$    | $0.8^{+1.0}_{-0.3}$      |
| J1032–5911 | $3.7 \pm 0.6$      | $1.1 \pm 0.2$       | $< 0.3$             | pl            | $0.4 - 1.5$          | $-2.5 \pm 0.4$   | –                      | –                      | –                        |
| J1034–3224 | $18 \pm 6$         | $8 \pm 3$           | $1.4 \pm 0.6$       | pl            | $0.4 - 3.3$          | $-1.6 \pm 0.4$   | –                      | –                      | –                        |
| J1036–4926 | $2.2 \pm 0.5$      | $0.8 \pm 0.2$       | $< 0.02$            | pl            | $0.3 - 1.5$          | $-1.5 \pm 0.5$   | –                      | –                      | –                        |
| J1038–5831 | $3.0 \pm 1.0$      | $2.3 \pm 0.9$       | $0.5 \pm 0.2$       | pl            | $0.6 - 3.1$          | $-1.3 \pm 0.6$   | –                      | –                      | –                        |
| J1041–1942 | –                  | $2.3 \pm 0.9$       | –                   | pl            | $0.4 - 1.5$          | $-2.0 \pm 0.4$   | –                      | –                      | –                        |
| J1043–6116 | $2.6 \pm 0.2$      | $1.39 \pm 0.07$     | $0.49 \pm 0.03$     | pl            | $0.7 - 3.4$          | $-1.2 \pm 0.1$   | $0.14^{+0.08}_{-0.05}$ | $0.16^{+0.01}_{-0.02}$ | $0.19^{+0.1}_{-0.09}$    |
| J1045–4509 | $7.0 \pm 1.0$      | $1.9 \pm 0.4$       | $0.33 \pm 0.09$     | broken pl     | $0.3 - 3.1$          | –                | –                      | –                      | –                        |
| J1046–5813 | $4.1 \pm 0.8$      | $1.4 \pm 0.3$       | $0.24 \pm 0.05$     | pl            | $0.4 - 3.1$          | $-1.9 \pm 0.3$   | –                      | –                      | –                        |
| J1047–6709 | $3.9 \pm 0.9$      | $3.1 \pm 0.9$       | $1.4 \pm 0.3$       | pl            | $0.4 - 3.5$          | $-0.7 \pm 0.2$   | –                      | –                      | –                        |
| J1048–5832 | $12.0 \pm 1.0$     | $9.1 \pm 0.5$       | $6.2 \pm 0.5$       | pl            | $0.6 - 17.0$         | $-0.52 \pm 0.08$ | $0.3^{+0.1}_{-0.1}$    | $0.34^{+0.07}_{-0.02}$ | $0.31^{+0.08}_{-0.1}$    |
| J1049–5833 | –                  | –                   | $0.07 \pm 0.01$     | –             | $1.4 - 3.1$          | –                | –                      | –                      | –                        |
| J1052–5954 | $< 0.2$            | $0.147 \pm 0.009$   | $0.071 \pm 0.005$   | –             | $1.4 - 3.1$          | –                | –                      | $0.45^{+0.02}_{-0.2}$  | $0.12^{+0.06}_{-0.06}$   |
| J1055–6028 | $1.2 \pm 0.2$      | $0.95 \pm 0.05$     | $0.13 \pm 0.01$     | lps           | $0.7 - 3.1$          | –                | $0.11^{+0.08}_{-0.05}$ | $0.22^{+0.02}_{-0.03}$ | $0.24^{+0.08}_{-0.2}$    |
| J1056–6258 | $54 \pm 6$         | $34 \pm 8$          | $11.0 \pm 1.0$      | pl            | $0.4 - 8.4$          | $-1.1 \pm 0.1$   | –                      | –                      | –                        |
| J1057–5226 | $22 \pm 5$         | $4.4 \pm 0.6$       | $1.4 \pm 0.3$       | lps           | $0.08 - 3.1$         | –                | $0.6^{+0.3}_{-0.4}$    | $1.0^{+0.1}_{-0.2}$    | $0.8^{+0.2}_{-0.3}$      |
| J1057–7914 | $2.4 \pm 0.9$      | –                   | $< 0.1$             | –             | $0.4 - 0.7$          | –                | –                      | –                      | –                        |
| J1058–5957 | –                  | $0.6 \pm 0.1$       | –                   | –             | $1.2 - 1.5$          | –                | –                      | –                      | –                        |
| J1059–5742 | $30 \pm 10$        | $2.0 \pm 0.6$       | $0.21 \pm 0.05$     | pl            | $0.4 - 3.1$          | $-3.3 \pm 0.4$   | –                      | –                      | –                        |
| J1105–6107 | $2.4 \pm 0.2$      | $1.2 \pm 0.07$      | $0.46 \pm 0.04$     | pl            | $0.7 - 3.4$          | $-1.1 \pm 0.1$   | $0.18^{+0.03}_{-0.1}$  | $0.36^{+0.06}_{-0.02}$ | $0.28^{+0.09}_{-0.06}$   |
| J1110–5637 | $4.7 \pm 0.7$      | $3.3 \pm 0.8$       | $0.9 \pm 0.2$       | pl            | $0.6 - 3.5$          | $-1.2 \pm 0.1$   | –                      | –                      | –                        |
| J1112–6103 | $< 0.08$           | $2.3 \pm 0.1$       | $1.03 \pm 0.07$     | pl            | $1.3 - 3.5$          | $-1.0 \pm 0.1$   | –                      | $0.22^{+0.04}_{-0.02}$ | $0.18^{+0.05}_{-0.05}$   |
| J1112–6613 | $12 \pm 4$         | $1.7 \pm 0.4$       | $0.32 \pm 0.05$     | pl            | $0.4 - 3.3$          | $-2.1 \pm 0.2$   | –                      | –                      | –                        |
| J1112–6926 | $4.0 \pm 1.0$      | $0.6 \pm 0.2$       | $0.4 \pm 0.1$       | pl            | $0.4 - 3.1$          | $-2.2 \pm 0.5$   | –                      | –                      | –                        |
| J1114–6100 | –                  | $4.7 \pm 0.9$       | $1.8 \pm 0.7$       | pl            | $0.6 - 3.5$          | $-0.9 \pm 0.4$   | –                      | –                      | –                        |
| J1115–6052 | $1.9 \pm 0.5$      | $0.48 \pm 0.03$     | $0.2 \pm 0.01$      | pl            | $0.7 - 3.1$          | $-1.2 \pm 0.2$   | –                      | $0.22^{+0.03}_{-0.01}$ | $0.17^{+0.06}_{-0.08}$   |
| J1116–4122 | $6 \pm 7$          | $6 \pm 2$           | $0.3 \pm 0.1$       | pl            | $0.09 - 3.1$         | $-1.2 \pm 0.1$   | –                      | –                      | –                        |
| J1117–6154 | –                  | $1.6 \pm 0.3$       | –                   | –             | $1.2 - 1.5$          | –                | –                      | –                      | –                        |
| J1119–6127 | $3.0 \pm 0.4$      | $1.09 \pm 0.06$     | $0.36 \pm 0.03$     | pl            | $0.7 - 3.4$          | $-1.4 \pm 0.2$   | –                      | $0.11^{+0.01}_{-0.01}$ | $0.24^{+0.07}_{-0.08}$   |
| J1119–7936 | $3.0 \pm 1.0$      | –                   | $< 0.06$            | –             | $0.4 - 0.7$          | –                | –                      | –                      | –                        |
| J1121–5444 | $4.3 \pm 0.9$      | $1.5 \pm 0.4$       | $0.22 \pm 0.05$     | pl            | $0.1 - 3.1$          | $-2.2 \pm 0.1$   | –                      | –                      | –                        |
| J1123–4844 | $2.5 \pm 0.5$      | $1.0 \pm 0.3$       | $0.4 \pm 0.1$       | pl            | $0.4 - 3.4$          | $-1.4 \pm 0.3$   | –                      | –                      | –                        |
| J1123–6102 | –                  | $1.1 \pm 0.2$       | –                   | –             | $1.2 - 1.5$          | –                | –                      | –                      | –                        |
| J1123–6259 | $2.0 \pm 0.2$      | $0.51 \pm 0.03$     | $0.1 \pm 0.006$     | pl            | $0.4 - 3.1$          | $-2.1 \pm 0.1$   | $0.2^{+0.1}_{-0.07}$   | $0.29^{+0.04}_{-0.03}$ | –                        |
| J1126–6942 | $3.0 \pm 1.0$      | –                   | $< 0.05$            | –             | $0.4 - 0.7$          | –                | –                      | –                      | –                        |
| J1133–6250 | $22 \pm 3$         | $7.0 \pm 1.0$       | $1.6 \pm 0.3$       | pl            | $0.6 - 3.5$          | $-1.8 \pm 0.1$   | –                      | –                      | –                        |
| J1136+1551 | –                  | $20 \pm 10$         | –                   | broken pl     | $0.02 - 32.0$        | –                | –                      | –                      | –                        |
| J1136–5525 | –                  | $6.0 \pm 1.0$       | –                   | pl            | $0.4 - 1.5$          | $-1.2 \pm 0.8$   | –                      | –                      | –                        |
| J1138–6207 | $< 0.3$            | $0.57 \pm 0.03$     | $0.27 \pm 0.02$     | pl            | $1.4 - 3.4$          | $-0.9 \pm 0.2$   | –                      | $0.22^{+0.04}_{-0.05}$ | $0.24^{+0.05}_{-0.1}$    |
| J1141–3322 | –                  | $1.6 \pm 0.5$       | –                   | pl            | $0.4 - 1.5$          | $-1.2 \pm 0.8$   | –                      | –                      | –                        |
| J1141–6545 | $15 \pm 4$         | $2.4 \pm 0.7$       | $0.28 \pm 0.08$     | pl            | $0.7 - 3.1$          | $-2.7 \pm 0.4$   | –                      | –                      | –                        |
| J1144–6146 | –                  | $< 0.6$             | –                   | –             | $1.4 - 1.4$          | –                | –                      | –                      | –                        |
| J1146–6030 | $10 \pm 3$         | $3.2 \pm 0.6$       | $1.1 \pm 0.3$       | pl            | $0.4 - 3.4$          | $-1.6 \pm 0.3$   | –                      | –                      | –                        |
| J1156–5707 | $0.5 \pm 0.1$      | $0.27 \pm 0.02$     | $0.12 \pm 0.01$     | pl            | $0.7 - 3.1$          | $-1.2 \pm 0.3$   | –                      | $0.34^{+0.06}_{-0.06}$ | –                        |

Table 1 – continued

| PSRJ       | $S_{728}$<br>[mJy] | $S_{1382}$<br>[mJy] | $S_{3100}$<br>[mJy] | class     | $\Delta\nu$<br>[GHz] | $\alpha$     | $m_r, 728$                             | $m_r, 1382$                               | $m_r, 3100$                              |
|------------|--------------------|---------------------|---------------------|-----------|----------------------|--------------|----------------------------------------|-------------------------------------------|------------------------------------------|
| J1156–5909 | < 40.0             | –                   | < 0.01              | –         | 0.4 – 0.4            | –            | –                                      | –                                         | –                                        |
| J1157–6224 | 54 ± 9             | 14 ± 3              | 1.8 ± 0.4           | pl        | 0.4 – 3.5            | –2.4 ± 0.1   | –                                      | –                                         | –                                        |
| J1159–7910 | –                  | 0.7 ± 0.2           | –                   | pl        | 0.4 – 1.5            | –2.0 ± 1.0   | –                                      | –                                         | –                                        |
| J1202–5820 | 9 ± 2              | 3.0 ± 0.8           | 0.7 ± 0.2           | pl        | 0.4 – 3.3            | –1.8 ± 0.3   | –                                      | –                                         | –                                        |
| J1210–5559 | 10 ± 2             | 2.3 ± 0.6           | 0.27 ± 0.07         | pl        | 0.4 – 3.3            | –2.4 ± 0.3   | –                                      | –                                         | –                                        |
| J1216–6223 | < 0.4              | 0.23 ± 0.01         | 0.061 ± 0.006       | –         | 1.4 – 3.1            | –            | –                                      | 0.19 <sup>+0.05</sup> <sub>–0.04</sub>    | –                                        |
| J1224–6407 | 20 ± 2             | 8.9 ± 0.5           | 3.0 ± 0.4           | pl        | 0.4 – 3.5            | –1.36 ± 0.08 | 0.22 <sup>+0.04</sup> <sub>–0.1</sub>  | 0.32 <sup>+0.04</sup> <sub>–0.04</sub>    | 0.4 <sup>+0.2</sup> <sub>–0.2</sub>      |
| J1227–6208 | –                  | –                   | < 0.01              | –         | 1.4 – 1.4            | –            | –                                      | –                                         | –                                        |
| J1231–6303 | 9 ± 2              | –                   | 0.5 ± 0.1           | pl        | 0.7 – 3.3            | –2.0 ± 0.3   | –                                      | –                                         | –                                        |
| J1235–5516 | –                  | –                   | < 0.1               | –         | 0.4 – 1.4            | –            | –                                      | –                                         | –                                        |
| J1239–6832 | 5.0 ± 1.0          | –                   | 0.15 ± 0.05         | pl        | 0.4 – 3.1            | –2.3 ± 0.4   | –                                      | –                                         | –                                        |
| J1243–6423 | 140 ± 30           | –                   | 4.1 ± 0.8           | broken pl | 0.4 – 8.4            | –            | –                                      | –                                         | –                                        |
| J1248–6344 | 1.1 ± 0.2          | 0.2 ± 0.01          | < 0.02              | –         | 0.7 – 1.4            | –            | –                                      | 0.31 <sup>+0.05</sup> <sub>–0.07</sub>    | –                                        |
| J1253–5820 | 25 ± 7             | –                   | 1.6 ± 0.5           | pl        | 0.4 – 3.5            | –1.8 ± 0.2   | –                                      | –                                         | –                                        |
| J1259–6741 | 8 ± 2              | –                   | 0.3 ± 0.1           | pl        | 0.4 – 3.3            | –2.1 ± 0.4   | –                                      | –                                         | –                                        |
| J1301–6305 | 0.7 ± 0.1          | 0.49 ± 0.03         | 0.21 ± 0.02         | pl        | 0.7 – 3.1            | –0.9 ± 0.2   | –                                      | 0.24 <sup>+0.05</sup> <sub>–0.02</sub>    | 0.24 <sup>+0.04</sup> <sub>–0.09</sub>   |
| J1302–6350 | 1.3 ± 0.5          | 4.5 ± 0.3           | 2.7 ± 0.3           | pl        | 0.6 – 8.4            | –0.5 ± 0.1   | 0.5 <sup>+0.4</sup> <sub>–0.2</sub>    | 0.34 <sup>+0.06</sup> <sub>–0.03</sub>    | 0.42 <sup>+0.09</sup> <sub>–0.1</sub>    |
| J1305–6203 | 8 ± 3              | 0.67 ± 0.04         | 0.23 ± 0.02         | pl        | 0.7 – 3.1            | –1.4 ± 0.3   | –                                      | 0.16 <sup>+0.02</sup> <sub>–0.02</sub>    | 0.23 <sup>+0.05</sup> <sub>–0.07</sub>   |
| J1305–6455 | 12 ± 2             | –                   | 0.44 ± 0.07         | pl        | 0.4 – 3.4            | –2.3 ± 0.2   | –                                      | –                                         | –                                        |
| J1312–5402 | 5.0 ± 1.0          | –                   | 0.13 ± 0.04         | pl        | 0.3 – 3.1            | –2.4 ± 0.2   | –                                      | –                                         | –                                        |
| J1312–5516 | 12 ± 3             | –                   | 0.6 ± 0.2           | pl        | 0.4 – 3.4            | –2.1 ± 0.3   | –                                      | –                                         | –                                        |
| J1312–6400 | 3.0 ± 1.0          | –                   | < 0.08              | –         | 0.7 – 1.4            | –            | –                                      | –                                         | –                                        |
| J1317–6302 | 4.2 ± 0.5          | –                   | 0.24 ± 0.03         | pl        | 0.7 – 3.3            | –2.0 ± 0.2   | –                                      | –                                         | –                                        |
| J1319–6056 | 7.0 ± 1.0          | –                   | 0.29 ± 0.05         | pl        | 0.6 – 3.3            | –2.2 ± 0.2   | –                                      | –                                         | –                                        |
| J1319–6105 | 2.3 ± 0.3          | –                   | 0.42 ± 0.07         | pl        | 0.7 – 3.4            | –1.4 ± 0.2   | –                                      | –                                         | –                                        |
| J1320–5359 | 8.0 ± 1.0          | 2.1 ± 0.1           | 0.51 ± 0.05         | pl        | 0.3 – 3.1            | –1.7 ± 0.2   | 0.4 <sup>+0.3</sup> <sub>–0.2</sub>    | 0.3 <sup>+0.06</sup> <sub>–0.03</sub>     | 0.3 <sup>+0.2</sup> <sub>–0.06</sub>     |
| J1326–5859 | 45 ± 8             | –                   | 3.6 ± 0.7           | pl        | 0.4 – 8.4            | –1.8 ± 0.1   | –                                      | –                                         | –                                        |
| J1326–6408 | 11 ± 2             | –                   | 0.32 ± 0.05         | pl        | 0.4 – 3.3            | –2.5 ± 0.1   | –                                      | –                                         | –                                        |
| J1326–6700 | –                  | –                   | 4.0 ± 1.0           | pl        | 0.4 – 3.5            | –1.1 ± 0.3   | –                                      | –                                         | –                                        |
| J1327–6222 | 160 ± 30           | –                   | 5.0 ± 1.0           | broken pl | 0.1 – 6.5            | –            | –                                      | –                                         | –                                        |
| J1327–6301 | 13 ± 2             | –                   | 1.1 ± 0.2           | pl        | 0.6 – 3.5            | –1.7 ± 0.2   | –                                      | –                                         | –                                        |
| J1327–6400 | 0.5 ± 0.2          | 0.21 ± 0.02         | 0.081 ± 0.008       | pl        | 0.7 – 3.1            | –1.3 ± 0.3   | –                                      | 0.3 <sup>+0.08</sup> <sub>–0.05</sub>     | 0.3 <sup>+0.1</sup> <sub>–0.2</sub>      |
| J1338–6204 | –                  | –                   | 1.1 ± 0.2           | pl        | 0.6 – 3.4            | –1.4 ± 0.3   | –                                      | –                                         | –                                        |
| J1341–6023 | 1.6 ± 0.3          | –                   | < 0.02              | –         | 0.7 – 1.4            | –            | –                                      | –                                         | –                                        |
| J1341–6220 | < 0.9              | 2.7 ± 0.1           | 1.24 ± 0.09         | pl        | 1.3 – 8.4            | –0.92 ± 0.09 | –                                      | 0.16 <sup>+0.01</sup> <sub>–0.02</sub>    | 0.21 <sup>+0.04</sup> <sub>–0.09</sub>   |
| J1345–6115 | 2.5 ± 0.5          | –                   | 0.2 ± 0.04          | pl        | 0.7 – 3.1            | –1.8 ± 0.4   | –                                      | –                                         | –                                        |
| J1347–5947 | 2.7 ± 0.5          | –                   | 0.14 ± 0.03         | pl        | 0.7 – 3.1            | –2.1 ± 0.4   | –                                      | –                                         | –                                        |
| J1349–6130 | < 1.0              | 0.76 ± 0.04         | 0.32 ± 0.02         | pl        | 1.3 – 3.1            | –1.0 ± 0.2   | –                                      | 0.15 <sup>+0.01</sup> <sub>–0.02</sub>    | 0.15 <sup>+0.04</sup> <sub>–0.05</sub>   |
| J1355–5153 | < 200.0            | –                   | < 0.3               | –         | 0.3 – 0.4            | –            | –                                      | –                                         | –                                        |
| J1356–5521 | < 100.0            | –                   | < 0.2               | –         | 0.4 – 1.4            | –            | –                                      | –                                         | –                                        |
| J1357–62   | 31 ± 5             | –                   | 2.5 ± 0.4           | pl        | 0.7 – 3.5            | –1.8 ± 0.1   | –                                      | –                                         | –                                        |
| J1357–6429 | 1.0 ± 0.3          | 0.52 ± 0.03         | 0.15 ± 0.02         | pl        | 0.7 – 3.1            | –1.4 ± 0.4   | –                                      | 0.34 <sup>+0.05</sup> <sub>–0.05</sub>    | 0.4 <sup>+0.1</sup> <sub>–0.2</sub>      |
| J1359–6038 | 57 ± 3             | 12.5 ± 0.6          | 2.1 ± 0.1           | broken pl | 0.1 – 8.4            | –            | 0.03 <sup>+0.02</sup> <sub>–0.01</sub> | 0.091 <sup>+0.005</sup> <sub>–0.01</sub>  | 0.1 <sup>+0.05</sup> <sub>–0.03</sub>    |
| J1401–6357 | 20 ± 6             | –                   | 1.9 ± 0.6           | pl        | 0.4 – 3.5            | –1.8 ± 0.2   | –                                      | –                                         | –                                        |
| J1406–6121 | < 0.3              | 0.44 ± 0.03         | 0.31 ± 0.02         | pl        | 1.4 – 6.5            | –0.5 ± 0.2   | –                                      | 0.24 <sup>+0.04</sup> <sub>–0.05</sub>    | 0.24 <sup>+0.02</sup> <sub>–0.1</sub>    |
| J1410–6132 | < 0.2              | 1.9 ± 0.1           | 1.79 ± 0.09         | lps       | 1.3 – 6.5            | –            | –                                      | 0.5 <sup>+0.05</sup> <sub>–0.05</sub>     | 0.038 <sup>+0.03</sup> <sub>–0.007</sub> |
| J1412–6145 | < 0.3              | 0.69 ± 0.04         | 0.2 ± 0.01          | pl        | 1.4 – 3.1            | –1.5 ± 0.2   | –                                      | 0.17 <sup>+0.02</sup> <sub>–0.02</sub>    | 0.21 <sup>+0.08</sup> <sub>–0.07</sub>   |
| J1413–6141 | < 0.4              | 0.82 ± 0.04         | 0.49 ± 0.03         | pl        | 1.4 – 3.5            | –0.5 ± 0.2   | –                                      | 0.22 <sup>+0.02</sup> <sub>–0.03</sub>    | 0.1 <sup>+0.04</sup> <sub>–0.03</sub>    |
| J1413–6222 | < 0.2              | –                   | 0.45 ± 0.06         | –         | 1.4 – 3.1            | –            | –                                      | –                                         | –                                        |
| J1413–6307 | 3.0 ± 0.8          | –                   | 0.5 ± 0.1           | pl        | 0.6 – 3.3            | –1.4 ± 0.4   | –                                      | –                                         | –                                        |
| J1415–6621 | 1.3 ± 0.2          | –                   | < 0.2               | –         | 0.7 – 1.5            | –            | –                                      | –                                         | –                                        |
| J1420–5416 | < 200.0            | –                   | < 6.0               | –         | 0.4 – 0.4            | –            | –                                      | –                                         | –                                        |
| J1420–6048 | < 1.0              | 1.19 ± 0.06         | 0.9 ± 0.05          | pl        | 1.3 – 3.5            | –0.3 ± 0.1   | –                                      | 0.16 <sup>+0.01</sup> <sub>–0.02</sub>    | 0.1 <sup>+0.05</sup> <sub>–0.02</sub>    |
| J1424–5822 | 4.3 ± 0.7          | –                   | 0.29 ± 0.06         | pl        | 0.7 – 3.3            | –1.9 ± 0.2   | –                                      | –                                         | –                                        |
| J1452–5851 | 0.6 ± 0.3          | 0.33 ± 0.02         | 0.123 ± 0.008       | pl        | 0.7 – 3.1            | –1.2 ± 0.2   | –                                      | 0.23 <sup>+0.04</sup> <sub>–0.04</sub>    | 0.14 <sup>+0.05</sup> <sub>–0.07</sub>   |
| J1452–6036 | 1.8 ± 0.2          | 1.9 ± 0.1           | 0.76 ± 0.05         | pl        | 0.7 – 3.5            | –1.1 ± 0.1   | –                                      | 0.13 <sup>+0.02</sup> <sub>–0.02</sub>    | 0.19 <sup>+0.1</sup> <sub>–0.08</sub>    |
| J1453–6413 | 80 ± 10            | 18.0 ± 1.0          | 2.4 ± 0.5           | broken pl | 0.08 – 8.4           | –            | 0.46 <sup>+0.07</sup> <sub>–0.2</sub>  | 0.47 <sup>+0.05</sup> <sub>–0.05</sub>    | 0.7 <sup>+0.5</sup> <sub>–0.3</sub>      |
| J1507–6640 | < 20.0             | –                   | < 2.0               | pl        | 0.4 – 1.5            | –2.8 ± 0.4   | –                                      | –                                         | –                                        |
| J1509–5850 | –                  | 0.21 ± 0.01         | < 0.05              | –         | 1.4 – 1.4            | –            | –                                      | 0.21 <sup>+0.07</sup> <sub>–0.04</sub>    | –                                        |
| J1512–5759 | 16.8 ± 0.9         | 7.8 ± 0.4           | 1.24 ± 0.06         | lps       | 0.6 – 3.5            | –            | 0.07 <sup>+0.05</sup> <sub>–0.02</sub> | 0.056 <sup>+0.009</sup> <sub>–0.008</sub> | 0.06 <sup>+0.02</sup> <sub>–0.02</sub>   |
| J1513–5739 | 0.07 ± 0.06        | –                   | < 10.0              | –         | 0.7 – 1.4            | –            | –                                      | –                                         | –                                        |
| J1513–5908 | 3.3 ± 0.3          | 1.43 ± 0.07         | 0.35 ± 0.03         | pl        | 0.4 – 3.1            | –1.5 ± 0.2   | 0.4 <sup>+0.1</sup> <sub>–0.1</sub>    | 0.139 <sup>+0.02</sup> <sub>–0.008</sub>  | 0.3 <sup>+0.03</sup> <sub>–0.07</sub>    |
| J1514–5925 | < 0.4              | 0.29 ± 0.02         | 0.16 ± 0.01         | –         | 1.4 – 3.1            | –            | –                                      | 0.29 <sup>+0.02</sup> <sub>–0.06</sub>    | 0.2 <sup>+0.04</sup> <sub>–0.09</sub>    |

Table 1 – *continued*

| PSRJ       | $S_{728}$<br>[mJy] | $S_{1382}$<br>[mJy] | $S_{3100}$<br>[mJy] | class         | $\Delta\nu$<br>[GHz] | $\alpha$         | $m_r, 728$            | $m_r, 1382$               | $m_r, 3100$              |
|------------|--------------------|---------------------|---------------------|---------------|----------------------|------------------|-----------------------|---------------------------|--------------------------|
| J1515–5720 | $1.04 \pm 0.07$    | $0.25 \pm 0.01$     | $0.08 \pm 0.01$     | pl            | $0.7 - 3.1$          | $-2.0 \pm 0.2$   | $0.13^{+0.2}_{-0.03}$ | $0.25^{+0.04}_{-0.04}$    | –                        |
| J1522–5829 | $30 \pm 6$         | –                   | $5.0 \pm 1.0$       | broken pl     | $0.6 - 8.4$          | –                | –                     | –                         | –                        |
| J1524–5625 | $1.8 \pm 0.5$      | $1.28 \pm 0.07$     | $0.55 \pm 0.03$     | pl            | $0.7 - 3.4$          | $-0.9 \pm 0.2$   | –                     | $0.18^{+0.02}_{-0.01}$    | $0.13^{+0.04}_{-0.05}$   |
| J1524–5706 | $0.17 \pm 0.04$    | $0.45 \pm 0.02$     | $0.14 \pm 0.02$     | pl            | $0.7 - 3.1$          | $-1.3 \pm 0.4$   | –                     | $0.21^{+0.04}_{-0.02}$    | $0.4^{+0.2}_{-0.2}$      |
| J1527–5552 | $< 200.0$          | –                   | $< 8.0$             | –             | $0.4 - 1.4$          | –                | –                     | –                         | –                        |
| J1530–5327 | $1.6 \pm 0.4$      | $0.92 \pm 0.06$     | $0.41 \pm 0.06$     | pl            | $0.7 - 3.1$          | $-0.9 \pm 0.4$   | –                     | $0.47^{+0.05}_{-0.04}$    | $0.5^{+0.2}_{-0.2}$      |
| J1531–5610 | $< 0.4$            | $0.87 \pm 0.05$     | $0.6 \pm 0.04$      | pl            | $1.4 - 6.5$          | $-0.4 \pm 0.2$   | –                     | $0.19^{+0.03}_{-0.03}$    | $0.13^{+0.1}_{-0.03}$    |
| J1534–5405 | $6.0 \pm 1.0$      | –                   | $0.21 \pm 0.05$     | pl            | $0.6 - 3.1$          | $-2.3 \pm 0.2$   | –                     | –                         | –                        |
| J1536–5433 | $< 80.0$           | –                   | $1.3 \pm 0.4$       | –             | $1.4 - 3.3$          | –                | –                     | –                         | –                        |
| J1538–5551 | $< 0.7$            | $0.33 \pm 0.02$     | $0.1 \pm 0.01$      | –             | $1.4 - 3.1$          | –                | –                     | $0.26^{+0.03}_{-0.04}$    | –                        |
| J1539–5626 | $7.6 \pm 0.8$      | $5.0 \pm 0.3$       | $2.1 \pm 0.1$       | pl            | $0.6 - 8.4$          | $-1.04 \pm 0.07$ | $0.23^{+0.05}_{-0.1}$ | $0.09^{+0.01}_{-0.02}$    | $0.1^{+0.05}_{-0.04}$    |
| J1541–5535 | $< 0.1$            | $0.3 \pm 0.02$      | $0.17 \pm 0.01$     | –             | $1.4 - 3.1$          | –                | –                     | $0.2^{+0.02}_{-0.02}$     | $0.23^{+0.1}_{-0.08}$    |
| J1543–5459 | $< 0.3$            | $0.81 \pm 0.04$     | $0.21 \pm 0.02$     | –             | $1.4 - 3.1$          | –                | –                     | $0.22^{+0.02}_{-0.04}$    | $0.2^{+0.2}_{-0.1}$      |
| J1548–4927 | $2.2 \pm 0.5$      | –                   | $0.2 \pm 0.06$      | pl            | $0.7 - 3.1$          | $-1.9 \pm 0.5$   | –                     | –                         | –                        |
| J1548–5607 | $3.1 \pm 0.4$      | $1.39 \pm 0.07$     | $0.3 \pm 0.02$      | pl            | $0.7 - 3.1$          | $-1.8 \pm 0.2$   | –                     | $0.1^{+0.02}_{-0.02}$     | $0.22^{+0.05}_{-0.09}$   |
| J1549–4848 | $4.1 \pm 0.7$      | $1.6 \pm 0.1$       | $0.25 \pm 0.04$     | pl            | $0.4 - 3.1$          | $-1.9 \pm 0.3$   | $0.5^{+0.1}_{-0.3}$   | $0.44^{+0.09}_{-0.05}$    | $0.4^{+0.2}_{-0.2}$      |
| J1551–5310 | $< 0.9$            | $0.72 \pm 0.04$     | $0.24 \pm 0.01$     | –             | $1.4 - 3.1$          | –                | –                     | $0.29^{+0.03}_{-0.04}$    | $0.14^{+0.02}_{-0.05}$   |
| J1600–5044 | $84 \pm 5$         | $21.0 \pm 1.0$      | $3.6 \pm 0.2$       | pl            | $0.3 - 8.4$          | $-2.16 \pm 0.05$ | $0.1^{+0.01}_{-0.06}$ | $0.045^{+0.006}_{-0.008}$ | $0.08^{+0.03}_{-0.02}$   |
| J1600–5751 | $9.2 \pm 0.5$      | $2.5 \pm 0.1$       | $0.54 \pm 0.07$     | pl            | $0.4 - 3.4$          | $-2.1 \pm 0.1$   | $0.1^{+0.08}_{-0.04}$ | $0.18^{+0.03}_{-0.02}$    | $0.4^{+0.1}_{-0.1}$      |
| J1601–5335 | $0.5 \pm 0.1$      | $0.25 \pm 0.02$     | $0.06 \pm 0.01$     | pl            | $0.7 - 3.1$          | $-1.5 \pm 0.5$   | –                     | $0.43^{+0.02}_{-0.2}$     | –                        |
| J1604–4909 | $23 \pm 6$         | –                   | $2.7 \pm 0.8$       | pl            | $0.4 - 3.4$          | $-1.6 \pm 0.3$   | –                     | –                         | –                        |
| J1610–5303 | $2.6 \pm 0.4$      | –                   | $< 0.01$            | –             | $0.7 - 1.4$          | –                | –                     | –                         | –                        |
| J1611–4949 | $< 1.0$            | –                   | $0.34 \pm 0.05$     | –             | $1.4 - 3.1$          | –                | –                     | –                         | –                        |
| J1611–5209 | $2.6 \pm 0.2$      | $1.45 \pm 0.09$     | $0.49 \pm 0.07$     | pl            | $0.6 - 3.4$          | $-1.1 \pm 0.2$   | $0.13^{+0.2}_{-0.06}$ | $0.37^{+0.04}_{-0.05}$    | $0.5^{+0.1}_{-0.2}$      |
| J1613–4714 | $8 \pm 2$          | –                   | $0.36 \pm 0.09$     | pl            | $0.4 - 3.3$          | $-2.2 \pm 0.3$   | –                     | –                         | –                        |
| J1614–5048 | $6.0 \pm 1.0$      | $4.1 \pm 0.2$       | $0.67 \pm 0.04$     | pl            | $0.7 - 3.5$          | $-2.16 \pm 0.09$ | –                     | $0.09^{+0.01}_{-0.01}$    | $0.089^{+0.005}_{-0.03}$ |
| J1617–5055 | $< 0.1$            | $0.27 \pm 0.02$     | $0.24 \pm 0.01$     | –             | $1.4 - 3.4$          | –                | –                     | $0.39^{+0.06}_{-0.08}$    | $0.11^{+0.04}_{-0.01}$   |
| J1618–4723 | $2.2 \pm 0.5$      | –                   | $< 0.03$            | –             | $0.7 - 1.4$          | –                | –                     | –                         | –                        |
| J1622–4802 | –                  | –                   | $0.32 \pm 0.06$     | pl            | $1.3 - 3.3$          | $-1.1 \pm 0.3$   | –                     | –                         | –                        |
| J1625–4048 | $3.3 \pm 0.8$      | –                   | $< 1.0$             | –             | $0.4 - 0.7$          | –                | –                     | –                         | –                        |
| J1626–4537 | $4.4 \pm 0.9$      | –                   | $0.29 \pm 0.06$     | pl            | $0.7 - 3.1$          | $-2.0 \pm 0.2$   | –                     | –                         | –                        |
| J1626–4807 | $< 0.3$            | $0.37 \pm 0.02$     | $0.26 \pm 0.02$     | –             | $1.4 - 3.1$          | –                | –                     | $0.32^{+0.08}_{-0.03}$    | $0.18^{+0.08}_{-0.06}$   |
| J1627–4706 | $< 0.09$           | $0.18 \pm 0.01$     | $0.061 \pm 0.005$   | –             | $1.4 - 3.1$          | –                | –                     | $0.2^{+0.04}_{-0.04}$     | –                        |
| J1630–4733 | $< 1.0$            | –                   | $3.4 \pm 0.4$       | pl            | $1.4 - 8.4$          | $-0.3 \pm 0.3$   | –                     | –                         | –                        |
| J1632–4621 | –                  | –                   | $0.21 \pm 0.02$     | pl            | $1.3 - 3.1$          | $-1.8 \pm 0.3$   | –                     | –                         | –                        |
| J1632–4757 | $< 0.3$            | $0.51 \pm 0.03$     | $0.2 \pm 0.01$      | –             | $1.4 - 3.1$          | –                | –                     | $0.22^{+0.05}_{-0.03}$    | $0.2^{+0.2}_{-0.09}$     |
| J1632–4818 | $< 0.1$            | $0.48 \pm 0.03$     | $0.101 \pm 0.006$   | –             | $1.4 - 3.1$          | –                | –                     | $0.23^{+0.02}_{-0.04}$    | $0.06^{+0.3}_{-0.03}$    |
| J1633–5015 | $27 \pm 4$         | –                   | $1.2 \pm 0.2$       | pl            | $0.6 - 3.3$          | $-2.2 \pm 0.2$   | –                     | –                         | –                        |
| J1635–5954 | $3.4 \pm 0.8$      | –                   | $0.4 \pm 0.1$       | lps           | $0.4 - 3.3$          | –                | –                     | –                         | –                        |
| J1636–4440 | $< 0.2$            | $0.29 \pm 0.02$     | $0.16 \pm 0.02$     | –             | $1.4 - 3.1$          | –                | –                     | $0.28^{+0.09}_{-0.05}$    | –                        |
| J1636–4803 | –                  | –                   | $0.37 \pm 0.04$     | pl            | $1.3 - 3.4$          | $-2.0 \pm 0.2$   | –                     | –                         | –                        |
| J1637–4553 | $3.0 \pm 0.4$      | $1.5 \pm 0.09$      | $0.37 \pm 0.03$     | pl            | $0.4 - 3.4$          | $-1.6 \pm 0.2$   | $0.33^{+0.07}_{-0.2}$ | $0.32^{+0.04}_{-0.05}$    | $0.2^{+0.1}_{-0.1}$      |
| J1637–4642 | $< 0.2$            | $0.93 \pm 0.05$     | $0.53 \pm 0.03$     | pl            | $1.4 - 3.4$          | $-0.6 \pm 0.2$   | –                     | $0.22^{+0.02}_{-0.04}$    | $0.13^{+0.04}_{-0.06}$   |
| J1638–4417 | $< 0.08$           | $0.3 \pm 0.02$      | $0.07 \pm 0.02$     | –             | $1.4 - 3.1$          | –                | –                     | $0.22^{+0.03}_{-0.03}$    | –                        |
| J1638–4608 | $< 0.3$            | $0.45 \pm 0.02$     | $0.121 \pm 0.009$   | –             | $1.4 - 3.1$          | –                | –                     | $0.21^{+0.02}_{-0.03}$    | $0.13^{+0.07}_{-0.04}$   |
| J1639–4359 | $4.9 \pm 0.9$      | –                   | $0.19 \pm 0.04$     | pl            | $0.7 - 3.1$          | $-2.3 \pm 0.3$   | –                     | –                         | –                        |
| J1639–4604 | $4.9 \pm 0.9$      | –                   | $0.15 \pm 0.03$     | pl            | $0.4 - 3.1$          | $-2.4 \pm 0.4$   | –                     | –                         | –                        |
| J1640–4715 | $4 \pm 2$          | $1.56 \pm 0.08$     | $0.6 \pm 0.03$      | pl            | $0.7 - 3.4$          | $-1.1 \pm 0.1$   | –                     | $0.13^{+0.01}_{-0.02}$    | $0.11^{+0.05}_{-0.07}$   |
| J1643–4505 | $< 0.4$            | $0.45 \pm 0.02$     | $0.27 \pm 0.02$     | pl            | $1.4 - 3.4$          | $-0.5 \pm 0.2$   | –                     | $0.16^{+0.04}_{-0.02}$    | $0.14^{+0.07}_{-0.04}$   |
| J1644–4559 | $1200 \pm 60$      | $300 \pm 60$        | $61 \pm 3$          | low turn-over | $0.3 - 17.0$         | –                | –                     | –                         | $0.04^{+0.5}_{-0.02}$    |
| J1646–4346 | $< 0.4$            | $1.25 \pm 0.08$     | $0.39 \pm 0.04$     | pl            | $1.3 - 3.1$          | $-1.4 \pm 0.3$   | –                     | $0.39^{+0.04}_{-0.04}$    | $0.4^{+0.06}_{-0.1}$     |
| J1646–6831 | $8 \pm 2$          | –                   | $0.7 \pm 0.4$       | pl            | $0.4 - 3.4$          | $-1.9 \pm 0.4$   | –                     | –                         | –                        |
| J1648–4611 | $< 0.07$           | $0.61 \pm 0.03$     | $0.46 \pm 0.03$     | –             | $1.4 - 3.1$          | –                | –                     | $0.23^{+0.03}_{-0.04}$    | $0.14^{+0.03}_{-0.05}$   |
| J1649–4349 | –                  | –                   | $< 0.07$            | –             | $1.4 - 1.4$          | –                | –                     | –                         | –                        |
| J1649–4653 | $< 0.1$            | $0.37 \pm 0.02$     | $0.13 \pm 0.01$     | pl            | $1.3 - 3.1$          | $-1.2 \pm 0.3$   | –                     | $0.21^{+0.06}_{-0.03}$    | $0.19^{+0.1}_{-0.08}$    |
| J1650–4502 | $< 2.0$            | $0.61 \pm 0.04$     | $0.27 \pm 0.03$     | –             | $1.4 - 3.1$          | –                | –                     | $0.29^{+0.02}_{-0.06}$    | $0.3^{+0.1}_{-0.2}$      |
| J1650–4921 | $< 0.3$            | $0.29 \pm 0.02$     | $0.31 \pm 0.03$     | pl            | $1.4 - 3.4$          | $0.1 \pm 0.2$    | –                     | $0.25^{+0.06}_{-0.04}$    | $0.22^{+0.05}_{-0.1}$    |
| J1651–4246 | $80 \pm 8$         | –                   | $2.8 \pm 0.3$       | low turn-over | $0.08 - 3.5$         | –                | –                     | –                         | –                        |
| J1651–5222 | $11 \pm 3$         | –                   | $1.7 \pm 0.4$       | pl            | $0.4 - 3.5$          | $-1.4 \pm 0.2$   | –                     | –                         | –                        |
| J1651–5255 | $9 \pm 2$          | –                   | $0.7 \pm 0.2$       | broken pl     | $0.4 - 3.4$          | –                | –                     | –                         | –                        |
| J1653–3838 | $2.6 \pm 0.5$      | –                   | $0.9 \pm 0.2$       | pl            | $0.6 - 3.5$          | $-0.7 \pm 0.2$   | –                     | –                         | –                        |
| J1653–4249 | $0.28 \pm 0.06$    | –                   | $2.0 \pm 1.0$       | pl            | $0.7 - 3.4$          | $1.0 \pm 0.6$    | –                     | –                         | –                        |
| J1654–4140 | $< 5.0$            | –                   | $0.1 \pm 0.02$      | –             | $1.4 - 3.1$          | –                | –                     | –                         | –                        |

Table 1 – *continued*

| PSRJ       | $S_{728}$<br>[mJy] | $S_{1382}$<br>[mJy] | $S_{3100}$<br>[mJy] | class        | $\Delta\nu$<br>[GHz] | $\alpha$         | $m_r, 728$            | $m_r, 1382$            | $m_r, 3100$            |
|------------|--------------------|---------------------|---------------------|--------------|----------------------|------------------|-----------------------|------------------------|------------------------|
| J1658–4958 | $3.7 \pm 0.8$      | –                   | $0.23 \pm 0.06$     | lps          | 0.7 – 3.3            | –                | –                     | –                      | –                      |
| J1700–3312 | $3.9 \pm 0.9$      | –                   | $0.31 \pm 0.08$     | pl           | 0.4 – 3.1            | $-1.8 \pm 0.3$   | –                     | –                      | –                      |
| J1701–3726 | $14 \pm 2$         | –                   | $0.9 \pm 0.2$       | pl           | 0.6 – 3.4            | $-2.0 \pm 0.2$   | –                     | –                      | –                      |
| J1701–4533 | $5.2 \pm 0.7$      | –                   | $0.6 \pm 0.1$       | pl           | 0.6 – 3.3            | $-1.4 \pm 0.2$   | –                     | –                      | –                      |
| J1702–4128 | $< 1.0$            | $1.17 \pm 0.07$     | $0.94 \pm 0.06$     | pl           | 1.4 – 6.5            | $-0.2 \pm 0.2$   | –                     | $0.27^{+0.04}_{-0.02}$ | $0.14^{+0.03}_{-0.04}$ |
| J1702–4306 | –                  | $0.46 \pm 0.04$     | –                   | –            | 1.3 – 1.4            | –                | –                     | –                      | –                      |
| J1702–4310 | –                  | $0.92 \pm 0.06$     | $0.42 \pm 0.07$     | pl           | 1.3 – 3.3            | $-1.1 \pm 0.3$   | –                     | $0.13^{+0.04}_{-0.03}$ | –                      |
| J1703–3241 | $30 \pm 8$         | –                   | $1.9 \pm 0.6$       | lps          | 0.4 – 3.5            | –                | –                     | –                      | –                      |
| J1703–4851 | $5.0 \pm 1.0$      | –                   | $< 0.09$            | pl           | 0.4 – 1.4            | $-2.3 \pm 0.5$   | –                     | –                      | –                      |
| J1704–6016 | $< 0.1$            | –                   | –                   | –            | 0.4 – 0.6            | –                | –                     | –                      | –                      |
| J1705–3423 | $15 \pm 4$         | –                   | $1.6 \pm 0.4$       | pl           | 0.4 – 3.4            | $-1.6 \pm 0.2$   | –                     | –                      | –                      |
| J1705–3950 | –                  | $1.6 \pm 0.1$       | $1.1 \pm 0.2$       | lps          | 0.6 – 3.4            | –                | –                     | $0.11^{+0.1}_{-0.04}$  | –                      |
| J1705–4108 | –                  | –                   | $1.0 \pm 0.1$       | pl           | 1.4 – 3.4            | $-0.4 \pm 0.5$   | –                     | –                      | –                      |
| J1707–4053 | $22 \pm 4$         | –                   | $1.5 \pm 0.3$       | hard cut-off | 0.2 – 6.5            | –                | –                     | –                      | –                      |
| J1707–4729 | $< 2.0$            | –                   | $0.8 \pm 0.2$       | pl           | 1.3 – 3.4            | $-1.4 \pm 0.3$   | –                     | –                      | –                      |
| J1708–3426 | $9 \pm 2$          | –                   | $0.24 \pm 0.06$     | pl           | 0.4 – 3.1            | $-2.6 \pm 0.3$   | –                     | –                      | –                      |
| J1709–4429 | –                  | $12.1 \pm 0.7$      | $5.0 \pm 1.0$       | pl           | 0.4 – 8.4            | $-0.8 \pm 0.2$   | –                     | $0.11^{+0.04}_{-0.05}$ | –                      |
| J1711–5350 | $4.0 \pm 1.0$      | –                   | $0.19 \pm 0.06$     | pl           | 0.4 – 3.1            | $-2.0 \pm 0.5$   | –                     | –                      | –                      |
| J1715–3903 | –                  | $0.66 \pm 0.05$     | $0.33 \pm 0.04$     | –            | 1.4 – 3.1            | –                | –                     | $0.2^{+0.05}_{-0.07}$  | –                      |
| J1715–4034 | $6.0 \pm 1.0$      | –                   | $0.26 \pm 0.06$     | pl           | 0.7 – 3.1            | $-2.2 \pm 0.2$   | –                     | –                      | –                      |
| J1717–3425 | $19 \pm 2$         | –                   | $0.6 \pm 0.09$      | pl           | 0.6 – 3.4            | $-2.4 \pm 0.1$   | –                     | –                      | –                      |
| J1717–4054 | $20 \pm 3$         | $< 0.06$            | $1.0 \pm 0.2$       | pl           | 0.4 – 3.4            | $-1.4 \pm 0.5$   | –                     | –                      | –                      |
| J1718–3825 | –                  | $1.7 \pm 0.1$       | $1.1 \pm 0.2$       | pl           | 1.3 – 3.5            | $-0.5 \pm 0.2$   | –                     | $0.15^{+0.02}_{-0.08}$ | –                      |
| J1719–4006 | $3.6 \pm 0.6$      | –                   | $0.41 \pm 0.07$     | pl           | 0.6 – 3.4            | $-1.5 \pm 0.2$   | –                     | –                      | –                      |
| J1720–1633 | $5 \pm 2$          | –                   | $< 0.1$             | pl           | 0.4 – 4.9            | $-2.1 \pm 0.4$   | –                     | –                      | –                      |
| J1721–3532 | –                  | $16.8 \pm 0.9$      | $8.0 \pm 0.7$       | pl           | 1.3 – 17.0           | $-0.8 \pm 0.1$   | –                     | $0.06^{+0.02}_{-0.02}$ | –                      |
| J1722–3207 | $17 \pm 4$         | –                   | $1.1 \pm 0.3$       | pl           | 0.08 – 3.4           | $-2.01 \pm 0.06$ | –                     | –                      | –                      |
| J1722–3712 | –                  | $3.8 \pm 0.3$       | $0.6 \pm 0.2$       | pl           | 0.4 – 3.5            | $-2.2 \pm 0.2$   | –                     | $0.23^{+0.04}_{-0.08}$ | –                      |
| J1723–3659 | –                  | $2.1 \pm 0.1$       | $0.71 \pm 0.09$     | lps          | 0.3 – 3.4            | –                | –                     | $0.16^{+0.09}_{-0.04}$ | –                      |
| J1726–3530 | –                  | $0.39 \pm 0.03$     | $0.18 \pm 0.06$     | –            | 1.4 – 3.1            | –                | –                     | $0.14^{+0.09}_{-0.07}$ | –                      |
| J1727–2739 | $7 \pm 2$          | –                   | $0.7 \pm 0.2$       | lps          | 0.7 – 3.1            | –                | –                     | –                      | –                      |
| J1730–2304 | $6 \pm 3$          | $3.0 \pm 1.0$       | $0.1 \pm 0.1$       | pl           | 0.1 – 3.1            | $-1.6 \pm 0.2$   | –                     | –                      | –                      |
| J1730–3350 | –                  | $4.3 \pm 0.2$       | $0.9 \pm 0.1$       | pl           | 1.3 – 8.4            | $-1.8 \pm 0.1$   | –                     | $0.06^{+0.02}_{-0.03}$ | –                      |
| J1731–4744 | –                  | $27 \pm 3$          | $7 \pm 2$           | lps          | 0.08 – 3.5           | –                | –                     | $0.36^{+0.07}_{-0.1}$  | –                      |
| J1733–3322 | $< 0.2$            | –                   | $0.35 \pm 0.06$     | pl           | 1.3 – 3.1            | $-1.8 \pm 0.4$   | –                     | –                      | –                      |
| J1733–3716 | –                  | $3.6 \pm 0.2$       | $2.1 \pm 0.3$       | pl           | 0.6 – 3.5            | $-0.6 \pm 0.2$   | –                     | $0.13^{+0.04}_{-0.08}$ | –                      |
| J1734–3333 | –                  | $0.49 \pm 0.06$     | $0.37 \pm 0.08$     | pl           | 1.4 – 3.5            | $-0.5 \pm 0.4$   | –                     | $0.45^{+0.5}_{-0.06}$  | –                      |
| J1735–3258 | –                  | $0.35 \pm 0.06$     | $0.39 \pm 0.05$     | pl           | 1.4 – 3.4            | $-0.1 \pm 0.4$   | –                     | $0.4^{+0.2}_{-0.2}$    | –                      |
| J1737–3137 | –                  | $0.88 \pm 0.06$     | $0.2 \pm 0.02$      | pl           | 1.3 – 3.1            | $-2.0 \pm 0.3$   | –                     | $0.23^{+0.04}_{-0.06}$ | –                      |
| J1737–3555 | $2.5 \pm 0.8$      | –                   | $0.28 \pm 0.09$     | pl           | 0.6 – 3.1            | $-1.2 \pm 0.4$   | –                     | –                      | –                      |
| J1738–2955 | –                  | $0.24 \pm 0.02$     | $0.04 \pm 0.01$     | –            | 1.4 – 3.1            | –                | –                     | $0.25^{+0.05}_{-0.1}$  | –                      |
| J1738–3211 | $5 \pm 2$          | –                   | $0.8 \pm 0.4$       | pl           | 0.6 – 3.5            | $-0.9 \pm 0.2$   | –                     | –                      | –                      |
| J1739–2903 | –                  | $4.5 \pm 0.3$       | $1.4 \pm 0.3$       | pl           | 0.6 – 3.4            | $-1.3 \pm 0.3$   | –                     | $0.11^{+0.04}_{-0.04}$ | –                      |
| J1739–3023 | –                  | $1.01 \pm 0.07$     | $0.16 \pm 0.03$     | pl           | 0.6 – 3.1            | $-1.5 \pm 0.2$   | –                     | $0.18^{+0.1}_{-0.02}$  | –                      |
| J1740–3015 | $18 \pm 2$         | $8.9 \pm 0.5$       | $3.4 \pm 0.2$       | pl           | 0.6 – 17.0           | $-1.11 \pm 0.06$ | $0.22^{+0.07}_{-0.1}$ | $0.19^{+0.02}_{-0.02}$ | $0.14^{+0.04}_{-0.05}$ |
| J1741–2733 | $6 \pm 2$          | –                   | $< 0.2$             | pl           | 0.7 – 1.5            | $-2.2 \pm 0.4$   | –                     | –                      | –                      |
| J1741–3016 | –                  | –                   | $0.29 \pm 0.05$     | pl           | 1.3 – 3.1            | $-2.4 \pm 0.4$   | –                     | –                      | –                      |
| J1741–3927 | $19 \pm 3$         | –                   | $2.0 \pm 0.4$       | pl           | 0.4 – 3.5            | $-1.6 \pm 0.1$   | –                     | –                      | –                      |
| J1743–3150 | $9 \pm 2$          | –                   | $0.31 \pm 0.08$     | broken pl    | 0.3 – 3.1            | –                | –                     | –                      | –                      |
| J1744–1134 | $12 \pm 9$         | $13 \pm 8$          | $0.3 \pm 0.3$       | pl           | 0.1 – 5.0            | $-1.7 \pm 0.1$   | –                     | –                      | –                      |
| J1744–3130 | $1.8 \pm 0.4$      | –                   | $0.35 \pm 0.08$     | pl           | 0.6 – 3.3            | $-1.1 \pm 0.3$   | –                     | –                      | –                      |
| J1745–3040 | –                  | $21.0 \pm 1.0$      | $4.2 \pm 0.7$       | lps          | 0.4 – 4.9            | –                | –                     | $0.19^{+0.03}_{-0.09}$ | –                      |
| J1748–1300 | $11 \pm 2$         | –                   | $0.3 \pm 0.2$       | pl           | 0.1 – 3.3            | $-1.8 \pm 0.2$   | –                     | –                      | –                      |
| J1749–3002 | $11 \pm 2$         | –                   | $1.0 \pm 0.2$       | pl           | 0.6 – 3.4            | $-1.6 \pm 0.2$   | –                     | –                      | –                      |
| J1751–3323 | $1.5 \pm 0.2$      | –                   | $0.9 \pm 0.1$       | broken pl    | 0.6 – 3.4            | –                | –                     | –                      | –                      |
| J1751–4657 | $30 \pm 10$        | –                   | $0.4 \pm 0.2$       | hard cut-off | 0.4 – 3.4            | –                | –                     | –                      | –                      |
| J1752–2806 | $350 \pm 50$       | –                   | $5 \pm 2$           | lps          | 0.06 – 10.7          | –                | –                     | –                      | –                      |
| J1755–2521 | $< 1.0$            | –                   | –                   | –            | 1.4 – 1.4            | –                | –                     | –                      | –                      |
| J1756–2435 | $6.0 \pm 1.0$      | –                   | $0.4 \pm 0.07$      | pl           | 0.6 – 3.3            | $-1.5 \pm 0.3$   | –                     | –                      | –                      |
| J1757–2223 | –                  | –                   | $0.34 \pm 0.08$     | pl           | 1.3 – 3.3            | $-1.5 \pm 0.4$   | –                     | –                      | –                      |
| J1757–2421 | –                  | $7.2 \pm 0.4$       | $2.2 \pm 0.3$       | pl           | 0.4 – 6.5            | $-1.27 \pm 0.08$ | –                     | $0.1^{+0.03}_{-0.03}$  | –                      |
| J1758–2630 | –                  | –                   | $< 0.03$            | –            | 1.3 – 1.5            | –                | –                     | –                      | –                      |
| J1759–1956 | $1.7 \pm 0.3$      | –                   | $0.1 \pm 0.02$      | pl           | 0.7 – 3.1            | $-2.0 \pm 0.4$   | –                     | –                      | –                      |

Table 1 – *continued*

| PSRJ        | $S_{728}$<br>[mJy] | $S_{1382}$<br>[mJy] | $S_{3100}$<br>[mJy] | class         | $\Delta\nu$<br>[GHz] | $\alpha$         | $m_r, 728$ | $m_r, 1382$            | $m_r, 3100$ |
|-------------|--------------------|---------------------|---------------------|---------------|----------------------|------------------|------------|------------------------|-------------|
| J1759–2205  | –                  | –                   | $0.5 \pm 0.1$       | pl            | $0.4 - 4.9$          | $-1.8 \pm 0.2$   | –          | –                      | –           |
| J1759–3107  | $4.0 \pm 0.7$      | –                   | $0.38 \pm 0.09$     | pl            | $0.7 - 3.3$          | $-1.6 \pm 0.2$   | –          | –                      | –           |
| J1801–2154  | –                  | $0.21 \pm 0.02$     | $0.069 \pm 0.009$   | –             | $1.4 - 3.1$          | –                | –          | –                      | –           |
| J1801–2304  | –                  | $7.0 \pm 0.5$       | $1.6 \pm 0.1$       | pl            | $1.3 - 6.5$          | $-1.7 \pm 0.1$   | –          | $0.19^{+0.05}_{-0.03}$ | –           |
| J1801–2451  | –                  | $1.46 \pm 0.09$     | $0.22 \pm 0.03$     | pl            | $0.6 - 3.1$          | $-0.8 \pm 0.2$   | –          | $0.14^{+0.05}_{-0.05}$ | –           |
| J1801–2920  | $7.0 \pm 1.0$      | –                   | $0.42 \pm 0.08$     | pl            | $0.6 - 3.3$          | $-2.0 \pm 0.2$   | –          | –                      | –           |
| J1803–1857  | $< 5.0$            | –                   | $< 0.3$             | –             | $1.3 - 1.5$          | –                | –          | –                      | –           |
| J1803–2137  | –                  | $15.0 \pm 1.0$      | $8.0 \pm 1.0$       | low turn-over | $0.3 - 6.5$          | –                | –          | $0.17^{+0.03}_{-0.04}$ | –           |
| J1805–1504  | $14 \pm 3$         | –                   | –                   | pl            | $0.7 - 1.5$          | $-1.8 \pm 0.2$   | –          | –                      | –           |
| J1806–1154  | $8 \pm 2$          | –                   | $0.4 \pm 0.1$       | broken pl     | $0.4 - 3.3$          | –                | –          | –                      | –           |
| J1806–2125  | –                  | $0.8 \pm 0.04$      | $0.16 \pm 0.02$     | pl            | $1.2 - 3.3$          | $-2.1 \pm 0.3$   | –          | $0.11^{+0.07}_{-0.05}$ | –           |
| J1807–0847  | $34 \pm 6$         | –                   | $4.0 \pm 1.0$       | pl            | $0.1 - 4.9$          | $-1.4 \pm 0.1$   | –          | –                      | –           |
| J1807–2459A | $< 0.2$            | –                   | $0.3 \pm 0.1$       | –             | $1.4 - 3.1$          | –                | –          | –                      | –           |
| J1808–0813  | $7.0 \pm 1.0$      | –                   | $0.23 \pm 0.04$     | pl            | $0.1 - 3.1$          | $-2.1 \pm 0.2$   | –          | –                      | –           |
| J1808–2057  | $16 \pm 2$         | –                   | $1.0 \pm 0.1$       | pl            | $0.6 - 4.9$          | $-2.0 \pm 0.2$   | –          | –                      | –           |
| J1809–1429  | $3.5 \pm 0.5$      | –                   | $0.24 \pm 0.04$     | pl            | $0.7 - 3.1$          | $-2.1 \pm 0.2$   | –          | –                      | –           |
| J1809–1917  | –                  | $2.8 \pm 0.2$       | $2.1 \pm 0.3$       | pl            | $1.2 - 6.5$          | $-0.4 \pm 0.2$   | –          | $0.26^{+0.02}_{-0.07}$ | –           |
| J1809–2109  | –                  | –                   | $0.28 \pm 0.05$     | pl            | $0.6 - 3.3$          | $-1.8 \pm 0.3$   | –          | –                      | –           |
| J1809–3547  | $20 \pm 10$        | –                   | –                   | –             | $0.4 - 0.8$          | –                | –          | –                      | –           |
| J1810–5338  | $12 \pm 3$         | –                   | $0.5 \pm 0.2$       | pl            | $0.4 - 3.3$          | $-2.1 \pm 0.4$   | –          | –                      | –           |
| J1812–1718  | –                  | –                   | $0.2 \pm 0.04$      | pl            | $1.3 - 3.1$          | $-2.2 \pm 0.4$   | –          | –                      | –           |
| J1812–1733  | $11 \pm 2$         | –                   | $1.0 \pm 0.1$       | lps           | $0.7 - 3.5$          | –                | –          | –                      | –           |
| J1812–1910  | –                  | $0.28 \pm 0.02$     | $0.076 \pm 0.009$   | –             | $1.4 - 3.1$          | –                | –          | $0.21^{+0.1}_{-0.08}$  | –           |
| J1812–2102  | –                  | –                   | $0.51 \pm 0.08$     | pl            | $1.3 - 4.9$          | $-1.8 \pm 0.2$   | –          | –                      | –           |
| J1815–1738  | –                  | $0.4 \pm 0.03$      | $0.14 \pm 0.02$     | pl            | $1.4 - 3.3$          | $-1.2 \pm 0.4$   | –          | $0.18^{+0.1}_{-0.07}$  | –           |
| J1817–3618  | $7 \pm 4$          | –                   | $0.4 \pm 0.2$       | pl            | $0.4 - 3.4$          | $-2.0 \pm 0.4$   | –          | –                      | –           |
| J1817–3837  | $9 \pm 4$          | –                   | $0.6 \pm 0.1$       | pl            | $0.4 - 3.4$          | $-1.7 \pm 0.4$   | –          | –                      | –           |
| J1818–1519  | $< 0.2$            | –                   | $< 0.02$            | –             | $1.4 - 1.4$          | –                | –          | –                      | –           |
| J1820–1529  | –                  | $0.83 \pm 0.08$     | $0.23 \pm 0.02$     | pl            | $1.3 - 3.4$          | $-1.7 \pm 0.2$   | –          | $0.3^{+0.1}_{-0.1}$    | –           |
| J1822–2256  | $16 \pm 4$         | –                   | $1.0 \pm 0.3$       | pl            | $0.4 - 3.4$          | $-1.8 \pm 0.1$   | –          | –                      | –           |
| J1822–4209  | $2.3 \pm 0.8$      | –                   | $0.3 \pm 0.1$       | pl            | $0.4 - 3.1$          | $-1.4 \pm 0.6$   | –          | –                      | –           |
| J1823–1115  | $11.0 \pm 1.0$     | –                   | $1.0 \pm 0.1$       | pl            | $0.4 - 4.9$          | $-1.52 \pm 0.09$ | –          | –                      | –           |
| J1823–3106  | $11 \pm 3$         | –                   | $1.2 \pm 0.4$       | pl            | $0.4 - 3.3$          | $-1.8 \pm 0.2$   | –          | –                      | –           |
| J1824–1118  | $6.2 \pm 0.8$      | –                   | $0.44 \pm 0.07$     | pl            | $0.6 - 4.9$          | $-2.1 \pm 0.2$   | –          | –                      | –           |
| J1824–1945  | –                  | $7.8 \pm 0.4$       | $1.3 \pm 0.2$       | lps           | $0.08 - 4.9$         | –                | –          | $0.12^{+0.02}_{-0.04}$ | –           |
| J1825–1446  | –                  | $2.9 \pm 0.2$       | $1.9 \pm 0.3$       | lps           | $0.3 - 4.9$          | –                | –          | $0.22^{+0.06}_{-0.07}$ | –           |
| J1826–1334  | –                  | $4.7 \pm 0.2$       | $3.0 \pm 0.4$       | lps           | $0.3 - 3.5$          | –                | –          | $0.05^{+0.04}_{-0.02}$ | –           |
| J1827–0750  | $7.0 \pm 1.0$      | –                   | $0.7 \pm 0.1$       | pl            | $0.7 - 3.4$          | $-1.6 \pm 0.2$   | –          | –                      | –           |
| J1828–0611  | $3.6 \pm 0.6$      | –                   | $0.43 \pm 0.08$     | pl            | $0.7 - 3.4$          | $-1.5 \pm 0.2$   | –          | –                      | –           |
| J1828–1057  | –                  | $0.33 \pm 0.04$     | $0.17 \pm 0.03$     | –             | $1.4 - 3.1$          | –                | –          | $0.27^{+0.05}_{-0.1}$  | –           |
| J1828–1101  | –                  | $2.3 \pm 0.2$       | $1.4 \pm 0.2$       | pl            | $1.3 - 4.9$          | $-0.6 \pm 0.3$   | –          | $0.22^{+0.05}_{-0.1}$  | –           |
| J1829–1751  | $28 \pm 6$         | –                   | $3.0 \pm 0.7$       | pl            | $0.4 - 4.9$          | $-1.7 \pm 0.1$   | –          | –                      | –           |
| J1830–1059  | –                  | $1.5 \pm 0.1$       | $0.6 \pm 0.1$       | lps           | $0.6 - 4.9$          | –                | –          | $0.32^{+0.09}_{-0.1}$  | –           |
| J1831–0823  | $3.4 \pm 0.7$      | –                   | $0.21 \pm 0.05$     | pl            | $0.7 - 3.1$          | $-1.9 \pm 0.3$   | –          | –                      | –           |
| J1831–0952  | –                  | $0.35 \pm 0.04$     | –                   | –             | $1.4 - 1.4$          | –                | –          | –                      | –           |
| J1831–1223  | $3.7 \pm 0.6$      | –                   | $0.24 \pm 0.05$     | pl            | $0.7 - 3.1$          | $-1.9 \pm 0.3$   | –          | –                      | –           |
| J1832–0644  | $< 0.1$            | –                   | $1.5 \pm 0.2$       | pl            | $1.4 - 3.4$          | $1.0 \pm 0.5$    | –          | –                      | –           |
| J1832–0827  | –                  | $4.0 \pm 0.3$       | $1.5 \pm 0.2$       | lps           | $0.4 - 6.5$          | –                | –          | $0.17^{+0.1}_{-0.05}$  | –           |
| J1833–0338  | $14 \pm 3$         | –                   | $0.35 \pm 0.05$     | pl            | $0.1 - 3.3$          | $-2.8 \pm 0.1$   | –          | –                      | –           |
| J1833–0827  | –                  | $6.9 \pm 0.4$       | $1.9 \pm 0.2$       | pl            | $0.6 - 4.9$          | $-1.5 \pm 0.1$   | –          | $0.15^{+0.02}_{-0.04}$ | –           |
| J1834–0731  | –                  | $1.3 \pm 0.1$       | $0.37 \pm 0.05$     | pl            | $0.6 - 4.9$          | $-1.6 \pm 0.1$   | –          | $0.22^{+0.06}_{-0.08}$ | –           |
| J1834–1710  | $4.0 \pm 1.0$      | –                   | $0.17 \pm 0.05$     | pl            | $0.7 - 3.1$          | $-2.2 \pm 0.4$   | –          | –                      | –           |
| J1835–0643  | –                  | $2.3 \pm 0.2$       | $0.6 \pm 0.2$       | lps           | $0.3 - 4.9$          | –                | –          | $0.26^{+0.01}_{-0.1}$  | –           |
| J1835–1020  | –                  | –                   | $0.9 \pm 0.3$       | lps           | $0.3 - 4.9$          | –                | –          | –                      | –           |
| J1835–1106  | –                  | $2.5 \pm 0.2$       | $0.5 \pm 0.1$       | pl            | $0.4 - 3.3$          | $-2.1 \pm 0.2$   | –          | $0.18^{+0.06}_{-0.06}$ | –           |
| J1836–0436  | $3.3 \pm 0.7$      | –                   | $0.7 \pm 0.2$       | pl            | $0.6 - 3.4$          | $-1.4 \pm 0.2$   | –          | –                      | –           |
| J1836–1008  | –                  | –                   | $0.5 \pm 0.1$       | lps           | $0.4 - 3.4$          | –                | –          | –                      | –           |
| J1837–0559  | –                  | $0.58 \pm 0.04$     | $0.13 \pm 0.02$     | pl            | $1.3 - 3.1$          | $-1.9 \pm 0.4$   | –          | $0.2^{+0.1}_{-0.05}$   | –           |
| J1837–0604  | –                  | $0.75 \pm 0.06$     | $0.38 \pm 0.04$     | pl            | $1.4 - 3.3$          | $-0.8 \pm 0.4$   | –          | $0.17^{+0.2}_{-0.06}$  | –           |
| J1837–0653  | $13 \pm 2$         | –                   | $0.8 \pm 0.2$       | pl            | $0.1 - 3.4$          | $-1.7 \pm 0.2$   | –          | –                      | –           |
| J1838–0453  | –                  | $0.4 \pm 0.05$      | $0.09 \pm 0.01$     | –             | $1.4 - 3.1$          | –                | –          | $0.3^{+0.1}_{-0.1}$    | –           |
| J1838–0549  | –                  | $0.42 \pm 0.04$     | $0.14 \pm 0.02$     | –             | $1.4 - 3.1$          | –                | –          | $0.19^{+0.05}_{-0.1}$  | –           |
| J1839–0321  | –                  | $0.27 \pm 0.03$     | $0.066 \pm 0.009$   | –             | $1.4 - 3.1$          | –                | –          | –                      | –           |

Table 1 – *continued*

| PSRJ       | $S_{728}$<br>[mJy] | $S_{1382}$<br>[mJy] | $S_{3100}$<br>[mJy] | class         | $\Delta\nu$<br>[GHz] | $\alpha$         | $m_r, 728$ | $m_r, 1382$            | $m_r, 3100$ |
|------------|--------------------|---------------------|---------------------|---------------|----------------------|------------------|------------|------------------------|-------------|
| J1839–0643 | < 2.0              | –                   | $0.56 \pm 0.09$     | pl            | 1.3 – 3.3            | $-1.5 \pm 0.3$   | –          | –                      | –           |
| J1839–0905 | –                  | $0.22 \pm 0.02$     | $0.11 \pm 0.02$     | –             | 1.4 – 3.1            | –                | –          | $0.15^{+0.08}_{-0.07}$ | –           |
| J1840–0809 | $5.0 \pm 0.8$      | –                   | $0.8 \pm 0.1$       | pl            | 0.7 – 3.5            | $-1.5 \pm 0.1$   | –          | –                      | –           |
| J1840–0815 | $9 \pm 2$          | –                   | $0.5 \pm 0.1$       | pl            | 0.7 – 3.3            | $-2.3 \pm 0.2$   | –          | –                      | –           |
| J1841–0425 | –                  | $3.3 \pm 0.2$       | $0.72 \pm 0.09$     | pl            | 0.6 – 3.4            | $-1.7 \pm 0.1$   | –          | $0.04^{+0.01}_{-0.01}$ | –           |
| J1841–0524 | –                  | $0.2 \pm 0.04$      | $0.048 \pm 0.007$   | –             | 1.4 – 3.1            | –                | –          | $0.43^{+0.04}_{-0.3}$  | –           |
| J1842–0153 | $1.4 \pm 0.2$      | –                   | $0.15 \pm 0.03$     | pl            | 0.7 – 3.1            | $-1.7 \pm 0.4$   | –          | –                      | –           |
| J1842–0359 | $36 \pm 8$         | –                   | $3.4 \pm 0.8$       | pl            | 0.1 – 3.5            | $-1.5 \pm 0.1$   | –          | –                      | –           |
| J1842–0905 | –                  | $1.04 \pm 0.07$     | $0.32 \pm 0.05$     | pl            | 0.6 – 3.3            | $-1.4 \pm 0.2$   | –          | $0.18^{+0.04}_{-0.07}$ | –           |
| J1843–0000 | $10 \pm 3$         | –                   | $1.2 \pm 0.4$       | pl            | 0.7 – 3.3            | $-1.5 \pm 0.2$   | –          | –                      | –           |
| J1843–0211 | $2.0 \pm 0.3$      | –                   | $0.31 \pm 0.05$     | lps           | 0.7 – 3.4            | –                | –          | –                      | –           |
| J1843–0355 | –                  | $0.89 \pm 0.07$     | $0.54 \pm 0.05$     | pl            | 1.4 – 3.4            | $-0.3 \pm 0.3$   | –          | $0.16^{+0.1}_{-0.07}$  | –           |
| J1843–0459 | $4.1 \pm 0.6$      | –                   | $0.21 \pm 0.04$     | pl            | 0.7 – 3.1            | $-2.4 \pm 0.4$   | –          | –                      | –           |
| J1843–0702 | –                  | $0.27 \pm 0.04$     | < 0.06              | –             | 1.4 – 1.4            | –                | –          | $0.3^{+0.2}_{-0.1}$    | –           |
| J1844–0256 | –                  | $0.59 \pm 0.06$     | $0.35 \pm 0.03$     | –             | 1.4 – 3.3            | –                | –          | $0.3^{+0.2}_{-0.1}$    | –           |
| J1844–0433 | $16 \pm 4$         | –                   | $0.24 \pm 0.07$     | pl            | 0.4 – 3.4            | $-1.8 \pm 0.1$   | –          | –                      | –           |
| J1844–0538 | –                  | $3.2 \pm 0.2$       | $0.55 \pm 0.07$     | pl            | 0.6 – 4.9            | $-1.9 \pm 0.1$   | –          | $0.1^{+0.01}_{-0.04}$  | –           |
| J1845–0743 | –                  | $3.7 \pm 0.2$       | $0.9 \pm 0.1$       | pl            | 1.3 – 3.4            | $-1.7 \pm 0.2$   | –          | $0.12^{+0.02}_{-0.04}$ | –           |
| J1845–1114 | $0.8 \pm 0.2$      | –                   | $0.3 \pm 0.07$      | –             | 0.7 – 3.1            | –                | –          | –                      | –           |
| J1847–0402 | –                  | $4.9 \pm 0.3$       | $1.4 \pm 0.2$       | lps           | 0.1 – 4.9            | –                | –          | $0.13^{+0.03}_{-0.05}$ | –           |
| J1847–0438 | < 0.2              | –                   | $0.15 \pm 0.03$     | pl            | 1.3 – 3.1            | $-1.7 \pm 0.5$   | –          | –                      | –           |
| J1847–0605 | < 3.0              | –                   | < 0.2               | –             | 1.3 – 1.5            | –                | –          | –                      | –           |
| J1848–0123 | $40 \pm 10$        | –                   | $3.1 \pm 0.8$       | pl            | 0.1 – 10.6           | $-1.64 \pm 0.09$ | –          | –                      | –           |
| J1848–1414 | $1.7 \pm 0.4$      | –                   | $0.07 \pm 0.02$     | pl            | 0.4 – 3.1            | $-2.2 \pm 0.4$   | –          | –                      | –           |
| J1849–0636 | $7 \pm 2$          | –                   | $0.23 \pm 0.06$     | pl            | 0.1 – 3.3            | $-2.3 \pm 0.1$   | –          | –                      | –           |
| J1850–0026 | < 0.1              | –                   | $0.6 \pm 0.08$      | –             | 1.4 – 3.3            | –                | –          | –                      | –           |
| J1852–0635 | $11 \pm 2$         | –                   | $10 \pm 2$          | broken pl     | 0.3 – 8.3            | –                | –          | –                      | –           |
| J1852–2610 | $1.9 \pm 0.7$      | –                   | –                   | –             | 0.4 – 1.4            | –                | –          | –                      | –           |
| J1853+0545 | < 0.3              | –                   | $1.1 \pm 0.3$       | pl            | 1.3 – 3.5            | $-1.2 \pm 0.2$   | –          | –                      | –           |
| J1853–0004 | –                  | $0.7 \pm 0.1$       | $0.17 \pm 0.02$     | pl            | 1.3 – 3.1            | $-2.3 \pm 0.3$   | –          | $0.58^{+0.04}_{-0.3}$  | –           |
| J1854–1421 | $9 \pm 2$          | –                   | $0.5 \pm 0.1$       | pl            | 0.4 – 3.3            | $-1.4 \pm 0.3$   | –          | –                      | –           |
| J1855+0307 | $1.9 \pm 0.2$      | –                   | $0.23 \pm 0.05$     | pl            | 0.7 – 3.1            | $-1.6 \pm 0.3$   | –          | –                      | –           |
| J1856+0404 | –                  | –                   | < 1.0               | –             | 1.3 – 1.5            | –                | –          | –                      | –           |
| J1857+0212 | $5.6 \pm 0.8$      | –                   | $0.8 \pm 0.1$       | lps           | 0.1 – 4.9            | –                | –          | –                      | –           |
| J1900–2600 | $50 \pm 20$        | –                   | $2.1 \pm 0.7$       | broken pl     | 0.08 – 10.7          | –                | –          | –                      | –           |
| J1900–7951 | $4 \pm 2$          | –                   | < 0.1               | –             | 0.4 – 0.8            | –                | –          | –                      | –           |
| J1901+0331 | $39 \pm 6$         | –                   | $0.9 \pm 0.2$       | pl            | 0.1 – 4.9            | $-2.7 \pm 0.1$   | –          | –                      | –           |
| J1901–0906 | $6.0 \pm 1.0$      | –                   | $0.19 \pm 0.07$     | pl            | 0.4 – 3.4            | $-2.4 \pm 0.3$   | –          | –                      | –           |
| J1902+0556 | –                  | –                   | $0.5 \pm 0.1$       | pl            | 0.1 – 4.9            | $-1.8 \pm 0.1$   | –          | –                      | –           |
| J1903+0135 | $29 \pm 4$         | –                   | $1.3 \pm 0.2$       | pl            | 0.4 – 4.9            | $-2.0 \pm 0.1$   | –          | –                      | –           |
| J1903–0632 | $7 \pm 2$          | –                   | $0.13 \pm 0.03$     | hard cut-off  | 0.1 – 3.1            | –                | –          | –                      | –           |
| J1903–0848 | $0.7 \pm 0.2$      | –                   | < 0.02              | –             | 0.7 – 0.8            | –                | –          | –                      | –           |
| J1904+0004 | $8 \pm 2$          | –                   | $0.6 \pm 0.1$       | pl            | 0.4 – 3.5            | $-1.8 \pm 0.2$   | –          | –                      | –           |
| J1905–0056 | $1.7 \pm 0.3$      | –                   | $0.12 \pm 0.03$     | pl            | 0.1 – 3.1            | $-2.19 \pm 0.08$ | –          | –                      | –           |
| J1907+0534 | $0.9 \pm 0.1$      | –                   | –                   | –             | 0.7 – 1.4            | –                | –          | –                      | –           |
| J1908+0500 | $3.4 \pm 0.7$      | –                   | $0.4 \pm 0.1$       | pl            | 0.4 – 3.4            | $-1.6 \pm 0.2$   | –          | –                      | –           |
| J1909+1102 | $12 \pm 3$         | –                   | $0.34 \pm 0.09$     | pl            | 0.1 – 3.4            | $-2.5 \pm 0.1$   | –          | –                      | –           |
| J1909–3744 | $1.5 \pm 0.8$      | $1.0 \pm 1.0$       | $0.5 \pm 0.4$       | pl            | 0.7 – 3.1            | $-1.2 \pm 0.1$   | –          | –                      | –           |
| J1913–0440 | $28 \pm 5$         | –                   | $1.8 \pm 0.5$       | low turn-over | 0.1 – 3.5            | –                | –          | –                      | –           |
| J1915+1009 | –                  | –                   | $0.39 \pm 0.09$     | pl            | 0.1 – 3.3            | $-2.0 \pm 0.1$   | –          | –                      | –           |
| J1916+1312 | –                  | –                   | $0.5 \pm 0.1$       | pl            | 0.1 – 4.9            | $-1.8 \pm 0.2$   | –          | –                      | –           |
| J1920+1040 | –                  | –                   | < 0.01              | –             | 1.3 – 1.5            | –                | –          | –                      | –           |
| J1932–3655 | $2.3 \pm 0.8$      | –                   | $0.09 \pm 0.04$     | –             | 0.4 – 3.1            | –                | –          | –                      | –           |
| J1933–6211 | $2 \pm 2$          | –                   | $0.2 \pm 0.2$       | –             | 0.7 – 3.1            | –                | –          | –                      | –           |
| J1941–2602 | $4 \pm 2$          | –                   | $0.5 \pm 0.2$       | pl            | 0.4 – 3.3            | $-1.6 \pm 0.3$   | –          | –                      | –           |
| J1946–2913 | $3.0 \pm 1.0$      | –                   | < 0.1               | pl            | 0.4 – 1.4            | $-2.0 \pm 0.5$   | –          | –                      | –           |
| J1947–4215 | < 0.07             | –                   | –                   | –             | 0.4 – 0.4            | –                | –          | –                      | –           |
| J2006–0807 | $11 \pm 5$         | –                   | < 0.02              | pl            | 0.1 – 1.4            | $-1.5 \pm 0.3$   | –          | –                      | –           |
| J2010–1323 | $1.1 \pm 0.7$      | –                   | –                   | –             | 0.7 – 1.4            | –                | –          | –                      | –           |
| J2038–3816 | $1.4 \pm 0.7$      | –                   | < 0.2               | –             | 0.4 – 0.7            | –                | –          | –                      | –           |
| J2046–0421 | –                  | –                   | $0.2 \pm 0.1$       | pl            | 0.1 – 3.1            | $-1.7 \pm 0.2$   | –          | –                      | –           |
| J2048–1616 | $40 \pm 30$        | –                   | $4 \pm 4$           | broken pl     | 0.08 – 8.5           | –                | –          | –                      | –           |
| J2051–0827 | $3 \pm 2$          | –                   | –                   | pl            | 0.1 – 3.0            | $-1.5 \pm 0.2$   | –          | –                      | –           |

**Table 1** – *continued*

| PSRJ       | $S_{728}$<br>[mJy] | $S_{1382}$<br>[mJy] | $S_{3100}$<br>[mJy] | class     | $\Delta\nu$<br>[GHz] | $\alpha$       | $m_{\mathrm{r}, 728}$ | $m_{\mathrm{r}, 1382}$ | $m_{\mathrm{r}, 3100}$ |
|------------|--------------------|---------------------|---------------------|-----------|----------------------|----------------|-----------------------|------------------------|------------------------|
| J2053–7200 | $11 \pm 7$         | –                   | $0.3 \pm 0.2$       | broken pl | 0.1 – 3.3            | –              | –                     | –                      | –                      |
| J2108–3429 | $2.0 \pm 1.0$      | –                   | –                   | –         | 0.4 – 0.7            | –              | –                     | –                      | –                      |
| J2145–0750 | $10 \pm 10$        | $0.8 \pm 0.4$       | $2 \pm 2$           | pl        | 0.1 – 5.0            | $-1.8 \pm 0.1$ | –                     | –                      | –                      |
| J2222–0137 | $1.0 \pm 1.0$      | –                   | $0.5 \pm 0.7$       | –         | 0.7 – 3.1            | –              | –                     | –                      | –                      |
| J2317+1439 | –                  | –                   | $< 0.02$            | pl        | 0.1 – 1.4            | $-1.3 \pm 0.4$ | –                     | –                      | –                      |
